1 **Accuracy of COVID-19 self-tests with unsupervised nasal or nasal plus oropharyngeal**  
2 **self-sampling in symptomatic individuals in the Omicron period**

3

4 Ewoud Schuit PhD (<https://orcid.org/0000-0002-9548-3214>)<sup>1,2\*</sup>

5 Roderick P Venekamp PhD (<https://orcid.org/0000-0002-1446-9614>)<sup>1\*</sup>

6 Lotty Hooft PhD (<https://orcid.org/0000-0002-7950-2980>)<sup>1,2</sup>

7 Irene K Veldhuijzen PhD (<https://orcid.org/0000-0002-3132-4070>)<sup>3</sup>

8 Wouter van den Bijllaardt MD (<https://orcid.org/0000-0003-0676-2594>)<sup>4,10</sup>

9 Suzan D Pas PhD (<https://orcid.org/0000-0003-1943-1217>)<sup>4,5</sup>

10 Vivian F Zwart MD (<https://orcid.org/0000-0002-0263-4379>)<sup>4</sup>

11 Esther B Lodder MD<sup>6</sup>

12 Marloes Hellwich MSc (<https://orcid.org/0000-0001-7539-4233>)<sup>7</sup>

13 Marco Koppelman PhD<sup>12</sup>

14 Richard Molenkamp PhD<sup>8</sup> (<https://orcid.org/0000-0002-9004-3850>)<sup>8</sup>

15 Constantijn Wijers MD<sup>9</sup>

16 Irene H Vroom MD<sup>9</sup>

17 Leonard C Smeets MD<sup>11</sup>

18 Carla R S Nagel-Imming (<https://orcid.org/0000-0003-2722-1885>)<sup>1</sup>

19 Wanda G H Han PhD (<https://orcid.org/0000-0003-0503-9783>)<sup>3</sup>

20 Susan van den Hof PhD (<https://orcid.org/0000-0002-2968-9652>)<sup>3</sup>

21 Jan AJW Kluytmans PhD (<https://orcid.org/0000-0003-2665-6844>)<sup>1</sup>

22 Janneke H M van de Wijgert PhD (<https://orcid.org/0000-0003-2728-4560>)<sup>1#</sup>

23 Karel G M Moons PhD (<https://orcid.org/0000-0003-2118-004X>)<sup>1,2#</sup>

24

25 \* Dual first authorship

26 # Dual last authorship

27

28 <sup>1</sup> Julius Center for Health Sciences and Primary Care, University Medical Center Utrecht, Utrecht University,

29 Universiteitsweg 100, 3584 CG Utrecht, The Netherlands

30 <sup>2</sup> Cochrane Netherlands, University Medical Center Utrecht, Utrecht University, Universiteitsweg 100, 3584 CG  
31 Utrecht, The Netherlands

32 <sup>3</sup> Centre for Infectious Disease Control, National Institute for Public Health and the Environment (RIVM),  
33 Antonie van Leeuwenhoeklaan 9, 3721 MA Bilthoven, The Netherlands

34 <sup>4</sup> Microvida Laboratory for Medical Microbiology, Amphia Hospital, Molengracht 21, 4818 CK Breda, The  
35 Netherlands

36 <sup>5</sup> Microvida Laboratory for Medical Microbiology, Bravis Hospital, Boerhaavelaan 25  
37 4708 AE Roosendaal, The Netherlands

38 <sup>6</sup> Public Health Service West-Brabant, Doornboslaan 225-227, 4816 CZ Breda, The Netherlands

39 <sup>7</sup> Public Health Service Hart voor Brabant, Reitseplein 3, 5037 AA Tilburg, The Netherlands

40 <sup>8</sup> Department of Viroscience, Erasmus MC, Doctor Molewaterplein 40, 3015 GD Rotterdam, The Netherlands

41 <sup>9</sup> Public Health Service Rotterdam-Rijnmond, Schiedamsedijk 95, 3011 EN Rotterdam, The Netherlands

42 <sup>10</sup> Department of Infection Control, Amphia Hospital, Molengracht 21, 4818 CK Breda, the Netherlands

43 <sup>11</sup> Reinier Haga Medical Diagnostic Center, Reinier de Graafweg 7, 2625 AD Delft, The Netherlands

44 <sup>12</sup> National Screening laboratory of Sanquin, Sanquin Blood Supply foundation, Plesmanlaan 125 1066 CX  
45 Amsterdam, The Netherlands

46

47 Correspondence to: KGM Moons, Julius Center for Health Sciences and Primary Care, University Medical  
48 Center Utrecht, Utrecht University, Universiteitsweg 100, 3584 CG Utrecht, The Netherlands, email:  
49 [k.g.m.moons@umcutrecht.nl](mailto:k.g.m.moons@umcutrecht.nl), Tel: +31887559305

50 **Abstract**

51 **Background** Performances of rapid antigen diagnostic tests (Ag-RDTs) with nasal self-sampling, and  
52 oropharyngeal plus nasal (OP-N) self-sampling, in the Omicron period are unknown.

53 **Methods** Prospective diagnostic accuracy study among 6,497 symptomatic individuals aged  $\geq 16$  years  
54 presenting for SARS-CoV-2 testing at three test-sites. Participants were sampled for RT-PCR (reference test)  
55 and received one Ag-RDT to perform unsupervised with either nasal self-sampling (during the emergence of  
56 Omicron, and after Omicron share was  $>90\%$ , phase-1) or with OP-N self-sampling (in a subsequent phase-2;  
57 Omicron share  $>99\%$ ). The evaluated tests were Acon Flowflex (Flowflex; phase-1 only), MP Biomedicals  
58 (MPBio), and Siemens-Healthineers Clinitest (Clinitest).

59 **Findings** During phase-1, 45% of Flowflex, 29% of MPBio, and 35% of Clinitest participants were confirmatory  
60 testers (previously tested positive by a self-test at own initiative). Overall sensitivities with nasal self-sampling  
61 were 79.0% (95% CI: 74.7-82.8%) for Flowflex, 69.9% (65.1-74.4%) for MPBio, and 70.2% (65.6-74.5%) for  
62 Clinitest. Sensitivities were substantially higher in confirmatory testers (93.6%, 83.6%, and 85.7%, respectively)  
63 than in those who tested for other reasons (52.4%, 51.5%, and 49.5%, respectively). Sensitivities decreased by  
64 6.1 ( $p=0.16$  by Chi-square test), 7.0 ( $p=0.60$ ), and 12.8 ( $p=0.025$ ) percentage points, respectively, when  
65 transitioning from 29% to  $>95\%$  Omicron. During phase-2, 53% of MPBio, and 44% of Clinitest participants  
66 were confirmatory testers. Overall sensitivities with OP-N self-sampling were 83.0% (78.8%-86.7%) for MPBio  
67 and 77.3% (72.9%-81.2%) for Clinitest. Comparing OP-N to nasal sampling, sensitivities were slightly higher in  
68 confirmatory testers (87.4% and 86.1%, respectively), and substantially higher in those testing for other reasons  
69 (69.3% and 59.9%, respectively).

70 **Interpretation** Sensitivities of three Ag-RDTs with nasal self-sampling decreased during Omicron emergence  
71 but was only statistically significant for Clinitest. Sensitivities were substantially influenced by the proportion of  
72 confirmatory testers. Addition of oropharyngeal to nasal self-sampling improved sensitivities of MPBio and  
73 Clinitest.

74 **Funding** Dutch Ministry of Health, Welfare, and Sport.

## 75 **Research into context**

### 76 **Evidence before this study**

77 SARS-CoV-2 rapid antigen diagnostic tests (Ag-RDTs) require no or minimal equipment, provide a result within  
78 15-30 minutes, and can be used in a range of settings including for self-testing at home. Self-testing may  
79 potentially lower the threshold to testing and allows individuals to obtain a test result quickly and at their own  
80 convenience, which could support the early detection of infectious cases and reduce community transmission.  
81 Real world evidence on the performance of unsupervised nasal and oropharyngeal plus nasal (OP-N) self-  
82 sampling in the Omicron variant period is needed to accurately inform end-users and policymakers. Therefore,  
83 we conducted a large prospective diagnostic accuracy study of three commercially available Ag-RDTs with self-  
84 sampling (the Acon Flowflex test, the MP Biomedicals test, and the Siemens-Healthineers Clinitest) during and  
85 after the emergence of Omicron using RT-PCR as the reference standard. Our aims were to evaluate whether the  
86 accuracies of Ag-RDTs with nasal self-sampling changed over time with the emergence of Omicron; and to  
87 determine whether addition of oropharyngeal to nasal self-sampling with the same swab yielded higher  
88 diagnostic accuracies.

89

### 90 **What this study adds**

91 The large comprehensive study was conducted in almost 6,500 participants with symptoms when presenting for  
92 routine SARS-CoV-2 testing at three public health service COVID-19 test-sites in the Netherlands. During the  
93 study, conducted between 21 December 2021 and 10 February 2022, the percentage of the Omicron variant in  
94 samples from the national SARS-CoV-2 pathogen surveillance increased from 29% in the first week to 99% in  
95 the last week of the study. The period during which the Omicron variant was dominant was divided into a nasal  
96 sampling phase (phase-1; Omicron present in >90% of surveillance samples) and an OP-N sampling phase  
97 (phase-2; Omicron share was >99%). In phase-1, 45% of Flowflex, 29% of MPBio, and 35% of Clinitest  
98 participants visited the test-site because of a positive self-test (confirmatory testers). Overall sensitivities with  
99 nasal self-sampling were 79.0% (95% CI: 74.7-82.8%) for the Flowflex, 69.9% (65.1-74.4%) for the MPBio, and  
100 70.2% (65.6-74.5%) for the Clinitest Ag-RDT. Sensitivities were 94%, 84%, and 86%, respectively, for  
101 confirmatory testers, and 52%, 52%, and 50%, respectively, for those who had other reasons for getting tested.  
102 Sensitivities were 87.0% (79.7-92.4%), 83.1% (72.9-90.7%), and 80.0% (51.9-95.7%), respectively, in the first  
103 week, and decreased by 6.1 (p=0.16 by Chi-square test), 7.0 (p=0.60), and 12.8 (p=0.025) percentage points in  
104 the final week of the study. In Phase-2, 53% of MPBio and 44% of Clinitest participants were confirmatory

105 testers. Overall sensitivities with OP-N self-sampling were 83.0% (78.8%-86.7%) for MPBio and 77.3% (72.9%-  
106 81.2%) for Clinitest. When comparing OP-N to nasal sampling, sensitivities were slightly higher in confirmatory  
107 testers (87.4% and 86.1%, respectively), and substantially higher in those testing for other reasons (69.3% and  
108 59.9%).

109

### 110 **Implications of all the available evidence**

111 The sensitivities of three commercially available Ag-RDTs performed with nasal self-sampling decreased during  
112 the emergence of Omicron, but this trend was only statistically significant for Clinitest. Addition of  
113 oropharyngeal to nasal self-sampling improved the sensitivity of the MPBio and Clinitest, most notably in  
114 individuals who visited the test-site for other reasons than to confirm a positive self-test. Based on these findings,  
115 the manufacturers of MPBio and Clinitest may consider extending their instructions for use to include combined  
116 oropharyngeal and nasal sampling, and other manufacturers may consider evaluating this as well.

## 117 **Introduction**

118 Rapid antigen diagnostic tests (Ag-RDTs) show promising performance for SARS-CoV-2 infection detection.<sup>1-5</sup>  
119 Ag-RDTs require minimal equipment, provide a result within 15-30 minutes, and can be performed in a range of  
120 settings without laboratory facilities. While Ag-RDTs were initially introduced for use by trained professionals,  
121 they are currently widely available over the counter. Self-testing, without supervision of a trained professional,  
122 lowers the threshold for testing and allows individuals to obtain a test result quickly, at their own convenience.  
123 This in turn could support early detection and self-isolation of infectious cases and reduce community  
124 transmission.<sup>6</sup>  
125 We previously showed that the SD Biosensor by Roche Diagnostics Ag-RDT with unsupervised nasal self-  
126 sampling had a 78.5% sensitivity in symptomatic individuals.<sup>7</sup> However, since end November 2021, the  
127 Omicron variant rapidly replaced the Delta variant. Performance of Ag-RDTs for Omicron might be different  
128 due to alterations in viral proteins and infection dynamics. Initial studies comparing Omicron and Delta variants  
129 found similar sensitivities for molecular tests<sup>8</sup>, mixed analytical performance of lateral flow devices<sup>9,10</sup>, and  
130 similar real-world sensitivities for Ag-RDTs with sampling and testing by trained professionals.<sup>11,12</sup>  
131 Additionally, anecdotal concerns were raised about the performance of Ag-RDTs when applying nasal self-  
132 sampling only since Omicron variant's viral particles seem more prevalent in the throat than nose. One study  
133 indeed showed improved Ag-RDT sensitivity with combined throat and nasal sampling by trained  
134 professionals.<sup>12</sup> Currently, real-world data on comparative accuracy of Ag-RDTs with unsupervised nasal or  
135 combined oropharyngeal plus nasal (OP-N) self-sampling are lacking.  
136 Therefore, we studied the accuracy of three widely commercially available Ag-RDTs with unsupervised self-  
137 sampling during and after emergence of Omicron using RT-PCR as reference standard; to evaluate whether  
138 accuracies of Ag-RDTs with nasal self-sampling changed over time; and to quantify whether addition of  
139 oropharyngeal to nasal self-sampling yields higher diagnostic accuracies.

140

## 141 **Methods**

142 The study is reported according to the STARD 2015 guidelines.<sup>13</sup>

143

### 144 **Study design and population**

145 This large prospective diagnostic test accuracy study was embedded within the Dutch public testing  
146 infrastructure. Testing is always by RT-PCR, free-of-charge, but only available for government-approved test

147 indications. During the study, 21 December 2021 to 10 February 2021, these were: having (i) any symptom of  
148 potential SARS-CoV-2 infection; (ii) been identified as close contact of a SARS-CoV-2 index case; (iii) tested  
149 positive on any commercially available Ag-RDT after self-sampling at own initiative (confirmatory testers); or  
150 (iv) returned from a country on the government's list of high-risk-countries.<sup>14</sup>

151 Participants were recruited consecutively at three public health service (PHS) COVID-19 test-sites, in  
152 Rotterdam-Rijnmond (Rotterdam), Central- and Northeast Brabant (Tilburg), and West-Brabant (Roosendaal).  
153 Individuals were eligible if 16 years or older and were willing and able to sign a digital informed consent form in  
154 Dutch. Current analyses only include individuals who reported any SARS-CoV-2 infection-related symptom at  
155 the time of sampling.

156 The estimated share of Omicron, according to national SARS-CoV-2 pathogen surveillance, increased during the  
157 study from 29% (week 51 2021) to 99% (week 5 2022; >95% BA.1 variant).<sup>15-17</sup> From 12 January 2022  
158 onwards, the Omicron share was >90%. Most analyses, apart from the time-trend analyses, included data from  
159 the latter Omicron period. That period was further subdivided into a nasal sampling only phase (phase-1;  
160 Omicron present in >90% of surveillance samples) and an OP-N sampling phase (phase-2; Omicron share  
161 >99%).

162

### 163 **Inclusion procedure, specimen collection and testing**

164 Individuals visiting one of the participating test-sites were asked by test-site staff whether they were willing to  
165 participate. If interested, they received participant information, a test-site specific Ag-RDT, and an email with a  
166 link to access study documentation. Next, trained test-site staff took a swab for routine RT-PCR testing. The RT-  
167 PCR sampling method differed slightly across test-sites; the Rotterdam and Tilburg sites used oropharyngeal and  
168 nasopharyngeal sampling, and the Roosendaal site combined oropharyngeal and nasal sampling (supplementary  
169 material 3). At all three sites, samples were tested in an off-site laboratory by RT-PCR on a Cobas 6800 or 8800  
170 platform (Roche Diagnostics).

171 During the initial study weeks (in 2021 and the first one in 2022) and during phase-1 (week 2 to 3 (MPBio and  
172 Clinitest) or 5 (Flowflex) in 2022), participants received instructions to perform the Ag-RDT at home using only  
173 nasal self-sampling according to the manufacturers' instructions. Participants received one of three Ag-RDTs:  
174 Acon Labs Flowflex COVID-19 Antigen Home Test ("Flowflex") in Rotterdam; MP Biomedicals Rapid SARS-  
175 CoV-2 Antigen Test Card ("MPBio") in Tilburg; and Siemens-Healthineers CLINITEST Rapid COVID-19  
176 Antigen Test ("Clinitest") in Roosendaal. During phase-2 (week 4 to 6 in 2022), participants in Tilburg (MPBio)

177 and Roosendaal (Clinitest) received instructions to perform OP-N self-sampling with the same swab according to  
178 the investigator's instructions for oropharyngeal sampling plus the manufacturer's instructions for nasal self-  
179 sampling. We did not evaluate the Flowflex test combined with OP-N sampling because the swab provided in  
180 the Flowflex test kits was deemed not suitable for OP self-sampling. All tests are CE-marked for nasal sampling.  
181 MPBio and Clinitest were not CE-marked for OP-N sampling, but after safety checks by the quality team of the  
182 PHS West-Brabant, and consultation with in-house in-vitro diagnostic regulation experts and the Medical Ethical  
183 Committee Utrecht, both Ag-RDTs were considered safe for use with OP-N sampling.

184 Participants interpreted their Ag-RDT results visually according to manufacturer's instructions, and always  
185 before they received their RT-PCR result from the PHS. Vice versa, the Ag-RDT result was not available to the  
186 laboratories that conducted the RT-PCR tests for the PHS. Participants received their RT-PCR result conform  
187 PHS routine practice to direct any further management, e.g., isolation, if applicable.

188 Participants were asked to complete the study procedures at home as soon as possible, and no later than within  
189 three hours of their test site visit. They were asked to first provide informed consent electronically via the  
190 participation link in the email, to subsequently perform the self-test, and to complete a short online questionnaire  
191 (supplementary material 1). Participants who did not complete this within three hours of their test-site visit were  
192 contacted by a call centre with the request to perform the self-test and complete the questionnaire as soon as  
193 possible.

194 Participants with a negative RT-PCR test result received an email after 10 days to complete a follow-up  
195 questionnaire (supplementary material 2) to capture any infections that were missed by the baseline RT-PCR  
196 test.

197

## 198 **Outcomes and statistical analyses**

199 Primary outcomes were diagnostic accuracy (sensitivity, specificity, positive and negative predictive values with  
200 corresponding 95% confidence intervals [95% CI]) of each Ag-RDT either with nasal or with OP-N self-  
201 sampling, and RT-PCR testing as reference. Secondary outcomes were diagnostic accuracies stratified by reason  
202 for testing (confirmatory testing after a positive self-test at one's own initiative, type of symptoms, close contact,  
203 or other reason), COVID-19 vaccination status (no vaccination or vaccinated once, twice, or thrice), having had  
204 prior SARS-CoV-2 infection, gender, and age (16-40, >40 years).

205 Also, we assessed whether performance of the three Ag-RDTs with nasal self-sampling changed over time  
206 during emergence of Omicron, by analysing the Ag-RDTs' sensitivities and specificities per week. Weekly



207 intervals were chosen because the share of the Omicron variant in The Netherlands was assessed weekly in the  
208 national pathogen surveillance.<sup>16</sup> Sensitivities in the first and last week were compared by Chi-square tests.  
209 All primary and secondary diagnostic accuracies were also determined after applying a viral load cut-off ( $\geq 5.2$   
210  $\log_{10}$  SARS-CoV-2 E-gene copies/mL). This was the viral load cut-off above which 95% of people with a  
211 positive RT-PCR test had a positive virus culture based on previous work.<sup>2</sup> Furthermore, considering the large  
212 influence of confirmatory testers in our study populations, all analyses were repeated stratified by confirmatory  
213 testing (yes/no).  
214 Finally, self-reported user experiences with each Ag-RDT and self-reported numbers of infections that may have  
215 been missed by baseline RT-PCR testing were assessed.  
216 We performed complete cases analysis because the number of individuals without RT-PCR test or Ag-RDT  
217 results was very low (Figure 1).

218

### 219 **Sample size calculation**

220 In our previous SD-Biosensor (Roche) SARS-CoV-2 nasal Ag-RDT self-testing study, we observed a sensitivity  
221 of 79% in symptomatic participants.<sup>7</sup> For the present study, we conservatively assumed sensitivities of 70% for  
222 all three Ag-RDTs irrespective of self-sampling method, with an error margin of 5%, type I error of 5% and  
223 power of 80%. Hence, we aimed for 335 positive RT-PCR tests per Ag-RDT and per self-sampling method.  
224 Since Omicron was emerging at start of the study mid-December 2021, we extended the study to ensure accrual  
225 of at least 335 positive RT-PCR tests per Ag-RDT and sampling strategy when Omicron comprised  $>90\%$ .<sup>16</sup>

226

### 227 **Role of the funding source**

228 This study was funded by the Dutch Ministry of Health, Welfare, and Sport. The funder had no role in design;  
229 collection, analysis, and interpretation of data; writing and decision to submit the paper for publication.

230

## 231 **Results**

232 A total of 3,076 individuals participated in the Delta-Omicron transition phase prior to phase-1 (Figure S1) and a  
233 further 2,199 in phase-1 and 1,222 individuals in phase-2 (Figure 1). Participant characteristics for the Delta-  
234 Omicron transition phase are presented in Table S1 and for phases 1 and 2 in Table 1.

235

236 *Overall Ag-RDT accuracies with nasal self-sampling in the Omicron period*

237 Overall sensitivities were 79.0% (74.7-82.8%) for Flowflex, 69.9% (65.1-74.4%) for MPBio, and 70.2% (65.6-  
238 74.5%) for Clinitest (Table 2, Figure 2). After applying the viral load cut-off, sensitivities increased to 85.6%  
239 (81.5-89.1%), 78.5% (73.8-82.8%), and 77.0% (72.4-81.2%), respectively (Figure S2). Specificities were >92%,  
240 positive predictive values >94%, and negative predictive values >59% for all three Ag-RDTs in all analyses  
241 (Table 2), with slightly higher specificities and PPVs for MPBio and Clinitest, and higher NPVs for Flowflex.  
242 Supplementary Tables S2-S4 show all 2×2 tables.

243

#### 244 *Overall Ag-RDT accuracies with combined OP-N self-sampling in the Omicron period*

245 Overall sensitivities were 83.0% (78.8-86.7%) for MPBio and 77.3% (72.9-81.2%) for Clinitest (Table 2, Figure  
246 2). After applying the viral load cut-off, sensitivities increased to 89.8% (86.0-92.9%) and 83.7% (79.5-87.3%),  
247 respectively (Figure S2). Specificities, positive predictive values, and negative predictive values were for both  
248 Ag-RDTs >93%, >96%, and >75%, respectively, in all analyses (Table 2).  
249 Supplementary Tables S5-S6 show all 2×2 tables.

250

#### 251 *Stratified Ag-RDT accuracies with either nasal or combined OP-N self-sampling*

252 With some differences across the three Ag-RDTs, we found lower sensitivities in participants who had had a  
253 previous SARS-CoV-2 infection, in women, and in those older than 40 (Table 2, Figure 2). Application of the  
254 viral load cut-off resulted in higher sensitivities, but all stratification trends remained similar, except that  
255 sensitivity differences by previous SARS-CoV-2 infection status were no longer significant for Flowflex (Figure  
256 S2). The largest differences in RT-PCR positivity percentages and Ag-RDTs performances were between  
257 confirmatory testers and individuals who visited the test-site for other reasons (Table 2, Figure 2). In  
258 confirmatory testers, sensitivities were 93.6% (89.9-96.2%) for Flowflex, 83.6% (78.1-88.2%) for MPBio, and  
259 85.7% (80.7-89.8%) for Clinitest with nasal self-sampling only, and 87.4% (82.9-91.0%) for MPBio and 86.1%  
260 (81.5-89.9%) for Clinitest with combined OP-N self-sampling (Table 2, Figure 2). In individuals who tested for  
261 other reasons, sensitivities were 52.4% (44-60.8%) for Flowflex, 51.5% (43.7-59.2%) for MPBio, and 49.5%  
262 (42.0-56.9%) for Clinitest with nasal self-sampling only, and 69.3% (58.6-78.7%) for MPBio and 59.9% (51.3-  
263 68.0%) for Clinitest with OP-N self-sampling. Diagnostic accuracies stratified by all reasons for testing are  
264 presented in Table S7.

265 Repeating all primary and secondary analyses in confirmatory and non-confirmatory testing participants  
266 separately indicated no distinctly different trends in sensitivities across subgroups (Figure S3 for nasal sampling

267 and Figure S4 for OP-N sampling). Differences across subgroups were less pronounced in the confirmatory  
268 testers than in non-confirmatory testers, with much higher sensitivities among confirmatory testers in all strata.

269

#### 270 *Ag-RDT accuracy changes over time during emergence of Omicron with nasal self-sampling only*

271 Sensitivities of all three Ag-RDTs were highest during the first week (Figure 3) when the Omicron share was  
272 28.6%: 87.0% (79.7-92.4%) for Flowflex, 80.0% (51.9-95.7%) for MPBio, and 83.1% (72.9-90.7%) for  
273 Clinitest. With emergence of Omicron, sensitivities decreased by 6.1 percentage points for Flowflex (Chi-square  
274 test statistic 2.0; p-value=0.16), 7.0 for MPBio (Chi-square test statistic 0.28; p-value=0.60), and 12.8 for  
275 Clinitest (Chi-square test statistic 5.0; p-value=0.025). Specificities varied between 93.2% and 99.6% over time.  
276 Application of the viral load cut-off resulted in higher sensitivities but all trends over time remained similar  
277 (Figure 3).

278 Stratification of the time trend analysis by reason for testing revealed that these time trends were similar but  
279 more pronounced in non-confirmatory testers than in confirmatory testers, although confidence intervals are  
280 wide (Figure S5).

281

#### 282 *User experiences and 10-day follow-up*

283 Information on user experiences and positive RT-PCR tests during the 10-day follow-up period are presented in  
284 Tables S8 and S9, respectively.

285

## 286 **Discussion**

287 This large diagnostic accuracy evaluation of three commercially available Ag-RDTs in symptomatic individuals  
288 showed overall sensitivities ranging from 70% to 79%, increasing to 77% to 85% when a viral load cut-off was  
289 applied, for unsupervised nasal self-sampling during a period in which Omicron was dominant. Emergence of  
290 Omicron was associated with a 6 to 13 percentage points decline in overall Ag-RDTs' sensitivities when  
291 combined with nasal self-sampling, although this trend was only significant for Clinitest. The overall  
292 sensitivities of the MPBio and Clinitest Ag-RDTs increased from 70% to 83% and 70% to 77%, respectively,  
293 when combined with OP-N self-sampling instead of nasal self-sampling only. All above-mentioned sensitivities  
294 were substantially higher in confirmatory testers than in those who visited test-sites for other reasons.

295

296 Our pre-Omicron studies, and when less than 5% of participants were confirmatory testers, found sensitivities of

297 72-83% for three different Ag-RDTs when performed by trained professionals, and 78.5% for the SD Biosensor  
298 Ag-RDT when performed with unsupervised self-sampling from the nose.<sup>7,18,19</sup> The sensitivities that we found in  
299 the first week of the current study, when Delta was still highly dominant, were similar (Flowflex 87%, MPBio  
300 80%, and Clinitest 83%), although the percentage of confirmatory testers in this study was much higher (21%-  
301 24%). However, sensitivities declined to 80%, 70%, and 70%, respectively, in the Omicron period. Recent  
302 studies from the USA and Italy that evaluated Ag-RDTs when Omicron was dominant, found comparable  
303 sensitivities of 74% (128/173 RT-PCR positives) and 82% (126/154 RT-PCR positives), but sampling was  
304 performed by professionals and sample sizes were smaller.<sup>11,12</sup>

305 We postulate several potential reasons for the somewhat lower sensitivities with Omicron. First, mutations in the  
306 Omicron's Nucleocapsid (N) protein, the target of Ag-RDTs, could influence binding efficiency of antibodies  
307 used in the Ag-RDTs. However, analytical sensitivity based on isolated Omicron and Delta virus generally  
308 appeared similar.<sup>9</sup> Second, the proportion of confirmatory testers, who obviously have a higher a-priori chance  
309 of testing positive on the Ag-RDT, may have fluctuated over time and by test-site, although our time trend  
310 analyses did not confirm this hypothesis (see below). Third, a larger proportion of individuals over time have  
311 experienced a SARS-CoV-2 infection, which may have affected Ag-RDT performance (see below). Fourth,  
312 during the study period the participating test-sites and laboratories experienced increasing requests for testing,  
313 exceeding the maximum capacity of the Dutch testing infrastructure. As a result, the exposure-testing intervals of  
314 participants may have been increased during those weeks, resulting in somewhat lower viral loads at the time of  
315 inclusion in the study.

316

317 The largest differences in RT-PCR positivity percentages and Ag-RDTs' performance were between  
318 confirmatory testers and individuals who attended the test-sites for other reasons. As expected, RT-PCR  
319 positivity percentages were close to 100% in the confirmatory testers and substantially lower (30% to 43%) in  
320 the 'other reasons' group. This agreed with test positivity percentages observed in national surveillance during  
321 the study. Logically, a higher proportion of confirmatory testers (93-95%) than other testers (76-77%) had viral  
322 loads above the used viral-load cut-off. Adding oropharyngeal to nasal sampling had a larger benefit in the other  
323 reasons group (10-18% increase in sensitivity) than in the confirmatory testers group (<1-4%) because the  
324 sensitivities were already very high in the latter group.

325

326 We found trends towards lower sensitivities in participants who had a previous SARS-CoV-2 infection (60-67%)

327 compared to those who had not (72-83%), with non-overlapping confidence intervals for Flowflex with nasal  
328 self-sampling only. This trend was absent for MPBio with OP-N sampling. These findings should be interpreted  
329 with caution due to the larger uncertainty around these subgroup specific accuracy estimates. However, we  
330 observed similar trends for the BD-Veritor and SD-Biosensor Ag-RDTs with either professional or self-sampling  
331 in two previous studies.<sup>5,7</sup> The lower sensitivities of Ag-RDTs in individuals with a prior infection may be  
332 explained by generally lower viral loads, with some individuals potentially carrying viral RNA in the absence of  
333 a productive infection (i.e. no viral antigen production). Another explanation might be that individuals with a  
334 prior infection have circulating anti-N-protein antibodies<sup>20</sup> which might bind to the N protein produced during  
335 the new infection, and thereby hampering the binding of monoclonal antibodies against the N-protein in the test  
336 device. These effects might be test device-specific given the variability in the performance across the three AG-  
337 RDTs.<sup>5</sup> We also found trends towards slightly higher sensitivities in participants who never received a COVID-  
338 19 vaccination for the MPBio and Clinitest Ag-RDTs with nasal self-sampling, but all confidence intervals  
339 overlapped with those who were vaccinated 1, 2 or 3 times and no differential impact was observed when  
340 combined OP-N sampling was applied. A detailed discussion of other subgroup analysis results can be found in  
341 supplementary material 4.

342

343 Our study is the only Ag-RDT diagnostic accuracy study thus far that was conducted during the emergence of  
344 Omicron, and that compared Ag-RDTs' performances with nasal self-sampling versus combined OP-N self-  
345 sampling. Additional strengths include the large numbers of participants recruited at multiple test-sites, the low  
346 percentage of missing values, reference test sampling and Ag-RDT self-testing within a few hours, unsupervised  
347 self-testing conform the real-world context of self-testing, blinding of participants for the reference test result,  
348 blinding of laboratory staff for the Ag-RDT result, and the use of a viral load cut-off.

349 Our study also has some limitations. First, the sample size calculation was based on the primary analysis and  
350 diagnostic accuracy parameters are by definition less precise for stratified and weekly analyses. Second, we did  
351 not determine the virus lineage in individual samples but relied on the national pathogen surveillance data to  
352 estimate the weekly Omicron variant prevalence.<sup>16</sup> This surveillance system includes approximately 2,000  
353 random samples from positive samples across the country on a weekly basis. Since regional variations in the  
354 Netherlands are very small (data not shown), we are confident that Omicron's share was over 90% in all test-  
355 sites from 12 January 2022 onwards. Third, the viral load cut-off that we used was the cut-off above which 95%  
356 of people with a positive RT-PCR test result had a positive virus culture in our similar previous study.<sup>2</sup> Those

357 experiments were done when the Alpha variant dominated and participants were mostly unvaccinated. However,  
358 we believe that this estimate is still more meaningful than using arbitrary Ct value cut-offs of 25 or 30, as is  
359 often done.<sup>21,22</sup>

360

361 We found that Ag-RDT performance with nasal self-sampling declined during the period that Omicron emerged.  
362 We also showed that Ag-RDT performance can be improved by adding oropharyngeal to nasal self-sampling.  
363 Therefore, after proper evaluation, Ag-RDT manufacturers may consider extending their instructions for use to  
364 include combined oropharyngeal and nasal self-sampling. Positive predictive values were high throughout our  
365 study, and symptomatic individuals can therefore rely on a positive Ag-RDT result irrespective of SARS-CoV-2  
366 variant dominance or method of self-sampling. Negative predictive values were much lower. In mid-January  
367 2022, the Dutch government advised all individuals with symptoms to do a self-test but advised vulnerable  
368 persons and those in close contacts with vulnerable persons to do RT-PCR tests at the PHS. In case of a negative  
369 self-test, individuals would be allowed to go to work or school. Our data show that this does reduce but not  
370 minimize transmission risks because of the likelihood of false-negative Ag-RDT results. As per national policy,  
371 we recommend that persons who test negative by self-test adhere to the general preventive measures such as  
372 applying hand hygiene, ensure indoor ventilation, and wearing mouth-nose masks in crowded places. In case of a  
373 positive self-test, self-isolation is required but confirmatory testing seems unnecessary in most situations if the  
374 infection pressure is high.

375 **References**

376

377 1. RIVM Centrum Infectieziektebestrijding. *Status validatie SARS-CoV-2 antigeen sneltesten, 10 Mar*  
378 *2021 [Dutch]*. 2021. <https://lci.rivm.nl/antigeensneltesten>

379 2. Schuit E, Veldhuijzen IK, Venekamp RP, et al. Diagnostic accuracy of rapid antigen tests in  
380 asymptomatic and presymptomatic close contacts of individuals with confirmed SARS-CoV-2 infection: cross  
381 sectional study. *BMJ*. Jul 27 2021;374:n1676. doi:10.1136/bmj.n1676

382 3. Brummer LE, Katzenschlager S, Gaeddert M, et al. Accuracy of novel antigen rapid diagnostics for  
383 SARS-CoV-2: A living systematic review and meta-analysis. *PLoS Med*. Aug 2021;18(8):e1003735.  
384 doi:10.1371/journal.pmed.1003735

385 4. Scheiblaue H, Filomena A, Nitsche A, et al. Comparative sensitivity evaluation for 122 CE-marked  
386 rapid diagnostic tests for SARS-CoV-2 antigen, Germany, September 2020 to April 2021. *Euro Surveill*. Nov  
387 2021;26(44)doi:10.2807/1560-7917.ES.2021.26.44.2100441

388 5. Venekamp RP, Veldhuijzen IK, Moons KGM, et al. Diagnostic accuracy of three prevailing rapid  
389 antigen tests for detection of SARS-CoV-2 infection in the general population: cross sectional study. *medRxiv*.  
390 2021;

391 6. European Centre for Disease Prevention and Control (ECDC). *Considerations on the use of self-tests for*  
392 *COVID-19 in the EU/EEA*. 2021. *ECDC Technical Report*.

393 7. Schuit E, Venekamp RP, Veldhuijzen IK, et al. Accuracy and usability of saliva and nasal rapid antigen  
394 self-testing for detection of SARS-CoV-2 infection in the general population: a head-to-head comparison.  
395 *medRxiv*. 2021;doi:<https://doi.org/10.1101/2021.12.08.21267452>

396 8. Molenkamp R, Igloi Z. *Evaluation of Antigen rapid test and PCR test to Omicron variant*. 2021.  
397 [https://www.erasmusmc.nl/-/media/erasmusmc/pdf/1-themaspecifiek/viroscience/2021-evaluation-omicron-in-](https://www.erasmusmc.nl/-/media/erasmusmc/pdf/1-themaspecifiek/viroscience/2021-evaluation-omicron-in-pcr-and-ag-assays.pdf)  
398 [pcr-and-ag-assays.pdf](https://www.erasmusmc.nl/-/media/erasmusmc/pdf/1-themaspecifiek/viroscience/2021-evaluation-omicron-in-pcr-and-ag-assays.pdf)

- 399 9. Deeraïn J, Druce J, Tran T, et al. Assessment of the Analytical Sensitivity of 10 Lateral Flow Devices  
400 against the SARS-CoV-2 Omicron Variant. *J Clin Microbiol.* Feb 16 2022;60(2):e0247921.  
401 doi:10.1128/jcm.02479-21
- 402 10. Osterman A, Badell I, Basara E, et al. Impaired detection of omicron by SARS-CoV-2 rapid antigen  
403 tests. *Med Microbiol Immunol.* Feb 20 2022;doi:10.1007/s00430-022-00730-z
- 404 11. de Michelena P, Torres I, Ramos-García A, et al. Real-life performance of a COVID-19 rapid antigen  
405 detection test targeting the SARS-CoV-2 nucleoprotein for diagnosis of COVID-19 due to the Omicron variant.  
406 *medRxiv.* 2022;doi:<https://doi.org/10.1101/2022.02.02.22270295>
- 407 12. Schrom J, Marquez C, Pilarowski G, et al. Direct Comparison of SARS-CoV-2 Nasal RT-PCR and  
408 Rapid Antigen Test (BinaxNOW™) at a Community Testing Site During an Omicron Surge. *medRxiv.*  
409 2022;doi:<https://doi.org/10.1101/2022.01.08.22268954>
- 410 13. Bossuyt PM, Reitsma JB, Bruns DE, et al. STARD 2015: an updated list of essential items for reporting  
411 diagnostic accuracy studies. *BMJ.* Oct 28 2015;351:h5527. doi:10.1136/bmj.h5527
- 412 14. European Centre for Disease Prevention and Control (ECDC). Combined indicator: 14-day notification  
413 rate, testing rate and test positivity, updated 16 September 2021, weeks 35-36. Updated 16 September 2021.  
414 Accessed 7 December 2021, 2021. [https://www.ecdc.europa.eu/en/publications-data/combined-indicator-week-](https://www.ecdc.europa.eu/en/publications-data/combined-indicator-week-36-2021)  
415 [36-2021](https://www.ecdc.europa.eu/en/publications-data/combined-indicator-week-36-2021)
- 416 15. Rijksoverheid. Variants of the corona virus. Updated 2 December 2021. Accessed 2 December 2021,  
417 <https://coronadashboard.rijksoverheid.nl/landelijk/varianten>
- 418 16. RIVM Centrum Infectieziektebestrijding. Variants of the corona virus SARS-CoV-2 [Dutch]. Updated  
419 30 November 2021. Accessed 2 December 2021, <https://www.rivm.nl/coronavirus-covid-19/virus/varianten>
- 420 17. RIVM Centrum Infectieziektebestrijding. Epidemiologische situatie van SARS-CoV-2 in Nederland  
421 [Dutch]. Updated 28 September 2021. Accessed 7 December 2021, 2021.  
422 [https://www.rivm.nl/sites/default/files/2021-09/COVID-](https://www.rivm.nl/sites/default/files/2021-09/COVID-19_WebSite_rapport_wekelijks_20210928_1146_final.pdf)  
423 [19\\_WebSite\\_rapport\\_wekelijks\\_20210928\\_1146\\_final.pdf](https://www.rivm.nl/sites/default/files/2021-09/COVID-19_WebSite_rapport_wekelijks_20210928_1146_final.pdf)



- 424 18. Klein JAF, Kruger LJ, Tobian F, et al. Head-to-head performance comparison of self-collected nasal  
425 versus professional-collected nasopharyngeal swab for a WHO-listed SARS-CoV-2 antigen-detecting rapid  
426 diagnostic test. *Med Microbiol Immunol*. Aug 2021;210(4):181-186. doi:10.1007/s00430-021-00710-9
- 427 19. Lindner AK, Nikolai O, Kausch F, et al. Head-to-head comparison of SARS-CoV-2 antigen-detecting  
428 rapid test with self-collected nasal swab versus professional-collected nasopharyngeal swab. *Eur Respir J*. Apr  
429 2021;57(4)doi:10.1183/13993003.03961-2020
- 430 20. Allen N, Brady M, Carrion Martin AI, et al. Serological markers of SARS-CoV-2 infection; anti-  
431 nucleocapsid antibody positivity may not be the ideal marker of natural infection in vaccinated individuals. *J*  
432 *Infect*. Oct 2021;83(4):e9-e10. doi:10.1016/j.jinf.2021.08.012
- 433 21. Igloi Z, Velzing J, van Beek J, et al. Clinical Evaluation of Roche SD Biosensor Rapid Antigen Test for  
434 SARS-CoV-2 in Municipal Health Service Testing Site, the Netherlands. *Emerg Infect Dis*. May  
435 2021;27(5):1323-1329. doi:10.3201/eid2705.204688
- 436 22. van Kampen JJA, van de Vijver D, Fraaij PLA, et al. Duration and key determinants of infectious virus  
437 shedding in hospitalized patients with coronavirus disease-2019 (COVID-19). *Nat Commun*. Jan 11  
438 2021;12(1):267. doi:10.1038/s41467-020-20568-4
- 439

440  
441  
442

**Table 1 Baseline characteristics of the symptomatic study population in the Omicron period, stratified by rapid antigen test.**

| Test result available from the reference test and ...  | Flowflex       | MPBio           |                 | Clinitest       |                |
|--------------------------------------------------------|----------------|-----------------|-----------------|-----------------|----------------|
| Test-site location                                     | Rotterdam      | Tilburg         |                 | Roosendaal      |                |
| Type of sampling                                       | Nasal          | Nasal           | OP-N            | Nasal           | OP-N           |
| Inclusion dates Omicron period (>90% Omicron)          | Jan 12 – Feb 3 | Jan 12 – Jan 18 | Jan 26 – Feb 10 | Jan 12 – Jan 23 | Jan 25 – Feb 8 |
| Sample size                                            | N = 620        | N = 820         | N = 543         | N = 726         | N = 653        |
| Age [years], mean (SD)                                 | 37 (14)        | 38 (14)         | 36 (13)         | 39 (14)         | 40 (13)        |
| Range (min-max)                                        | 16-77          | 16-85           | 16-72           | 16-81           | 16-87          |
| Sex, female, n (%) <sup>†</sup>                        | 357 (57.6)     | 524 (63.9)      | 375 (69.1)      | 449 (61.8)      | 437 (66.9)     |
| Reported symptoms at the time of testing, n (%)        | 620 (100)      | 820 (100)       | 543 (100)       | 726 (100)       | 653 (100)      |
| Self-reported reasons for testing, n (%) <sup>#</sup>  |                |                 |                 |                 |                |
| Positive self-test                                     | 279 (45.0)     | 239 (29.1)      | 288 (53.0)      | 257 (35.4)      | 290 (44.4)     |
| Symptoms                                               | 405 (65.3)     | 510 (62.2)      | 354 (65.2)      | 459 (63.2)      | 390 (59.7)     |
| Close contact                                          | 72 (11.6)      | 170 (20.7)      | 58 (10.7)       | 144 (19.8)      | 99 (15.2)      |
| Other reason                                           | 49 (7.9)       | 54 (6.6)        | 15 (2.8)        | 29 (4.0)        | 24 (3.7)       |
| Vaccination status                                     |                |                 |                 |                 |                |
| Not vaccinated                                         | 75 (12.1)      | 68 (8.3)        | 56 (10.3)       | 90 (12.4)       | 66 (10.1)      |
| Vaccinated with at least one dose, n (%)               | 545 (87.9)     | 752 (91.7)      | 487 (89.7)      | 636 (87.6)      | 586 (89.7)     |
| Number of vaccinations received, n (%) <sup>§</sup>    |                |                 |                 |                 |                |
| 1                                                      | 38 (7.0)       | 86 (11.4)       | 40 (8.2)        | 52 (8.2)        | 40 (6.8)       |
| 2                                                      | 233 (42.8)     | 329 (43.8)      | 184 (37.8)      | 334 (52.5)      | 214 (36.5)     |
| 3                                                      | 274 (50.3)     | 336 (44.7)      | 263 (54.0)      | 248 (39.0)      | 332 (56.7)     |
| Unknown                                                | 0 (0)          | 1 (0.1)         | 0 (0)           | 2 (0.3)         | 0 (0)          |
| Type of initial vaccination series, n (%) <sup>§</sup> |                |                 |                 |                 |                |
| Pfizer                                                 | 438 (80.4)     | 502 (66.8)      | 341 (70.0)      | 410 (64.5)      | 352 (60.1)     |
| Moderna                                                | 34 (6.2)       | 96 (12.8)       | 43 (8.8)        | 116 (18.2)      | 104 (17.7)     |
| Astra Zeneca                                           | 32 (5.9)       | 88 (11.7)       | 51 (10.5)       | 62 (9.7)        | 82 (14.0)      |
| Janssen                                                | 40 (7.3)       | 62 (8.2)        | 50 (10.3)       | 45 (7.1)        | 44 (7.5)       |
| Unknown/Other                                          | 1 (0.2)        | 4 (0.5)         | 2 (0.4)         | 3 (0.5)         | 4 (0.7)        |
| Type of booster vaccine, n (%) <sup>§</sup>            |                |                 |                 |                 |                |
| Pfizer                                                 | 200 (36.7)     | 219 (29.1)      | 214 (43.9)      | 168 (26.4)      | 256 (43.7)     |
| Moderna                                                | 99 (18.2)      | 137 (18.2)      | 76 (15.6)       | 93 (14.6)       | 93 (15.9)      |
| No booster received                                    | 242 (44.4)     | 388 (51.6)      | 187 (38.4)      | 366 (57.5)      | 225 (38.4)     |
| Unknown                                                | 4 (0.7)        | 8 (1.1)         | 10 (2.1)        | 9 (1.4)         | 12 (2.0)       |
| At least one prior SARS-CoV-2 infection, n (%)         | 148 (23.9)     | 185 (22.6)      | 135 (24.9)      | 127 (17.5)      | 121 (18.5)     |
| Less than 2 months ago                                 | 14 (9.5)       | 16 (8.6)        | 12 (8.9)        | 13 (10.2)       | 11 (9.1)       |
| 2 to 6 months ago                                      | 24 (16.2)      | 22 (11.9)       | 25 (18.5)       | 7 (5.5)         | 34 (28.1)      |
| 6 to 12 months ago                                     | 62 (41.9)      | 84 (45.4)       | 50 (37.0)       | 40 (31.5)       | 33 (27.3)      |
| More than 12 months ago                                | 48 (32.4)      | 63 (34.1)       | 48 (35.6)       | 66 (52.0)       | 43 (35.5)      |
| Unknown                                                | 0 (0)          | 0 (0)           | 0 (0)           | 1 (0.8)         | 0 (0)          |
| Symptom onset, n (%)                                   |                |                 |                 |                 |                |
| On day of sampling                                     | 48 (7.7)       | 71 (8.7)        | 59 (10.9)       | 42 (5.8)        | 40 (6.1)       |
| A day before sampling                                  | 239 (38.5)     | 281 (34.3)      | 179 (33.0)      | 201 (27.7)      | 178 (27.3)     |
| Two days before sampling                               | 192 (31.0)     | 257 (31.3)      | 157 (28.9)      | 273 (37.6)      | 229 (35.1)     |
| Three or more days before sampling                     | 140 (22.6)     | 208 (25.4)      | 148 (27.3)      | 210 (28.9)      | 205 (31.4)     |
| Unknown                                                | 1 (0.2)        | 3 (0.4)         | 0 (0)           | 0 (0)           | 1 (0.2)        |
| Type of symptoms (self-reported), n (%) <sup>#</sup>   |                |                 |                 |                 |                |
| Common cold                                            | 543 (87.6)     | 717 (87.4)      | 499 (91.9)      | 613 (84.4)      | 583 (89.3)     |
| Shortness of breath                                    | 93 (15.0)      | 109 (13.3)      | 87 (16.0)       | 99 (13.6)       | 102 (15.6)     |
| Fever                                                  | 143 (23.1)     | 141 (17.2)      | 120 (22.1)      | 162 (22.3)      | 157 (24.0)     |
| Coughing                                               | 310 (50.0)     | 378 (46.1)      | 283 (52.1)      | 386 (53.2)      | 350 (53.6)     |
| Loss of taste or smell                                 | 26 (4.2)       | 27 (3.3)        | 20 (3.7)        | 25 (3.4)        | 29 (4.4)       |
| Muscle ache                                            | 137 (22.1)     | 154 (18.8)      | 122 (22.5)      | 192 (26.4)      | 152 (23.3)     |
| Other symptoms                                         | 88 (14.2)      | 123 (15.0)      | 85 (15.7)       | 116 (16.0)      | 108 (16.5)     |
| Previous experience with using self-tests, n (%)       | 589 (95.2)     | 791 (96.7)      | 535 (98.5)      | 698 (96.3)      | 627 (96.2)     |
| Performed last self-test, n (%) <sup>§</sup>           |                |                 |                 |                 |                |
| Less than 7 days ago                                   | 501 (85.1)     | 661 (83.6)      | 461 (86.2)      | 588 (84.2)      | 545 (86.9)     |
| 1 to 4 weeks ago                                       | 64 (10.9)      | 92 (11.6)       | 51 (9.5)        | 75 (10.7)       | 47 (7.5)       |
| More than 1 months ago                                 | 23 (3.9)       | 37 (4.7)        | 22 (4.1)        | 35 (5.1)        | 34 (5.4)       |
| Unknown                                                | 1 (0.2)        | 1 (0.1)         | 9 (0.2)         | 0 (0)           | 1 (0.2)        |
| Number of ever performed self-tests, n (%)             |                |                 |                 |                 |                |
| 1-3                                                    | 110 (18.7)     | 171 (21.6)      | 90 (16.8)       | 193 (27.7)      | 126 (20.2)     |
| 4-6                                                    | 125 (21.2)     | 198 (25.1)      | 128 (23.9)      | 208 (29.8)      | 182 (29.1)     |
| 7-10                                                   | 158 (26.8)     | 181 (22.9)      | 118 (22.1)      | 153 (21.9)      | 130 (20.8)     |
| >10                                                    | 196 (33.3)     | 240 (30.4)      | 199 (37.2)      | 144 (20.6)      | 187 (29.9)     |

443  
444  
445  
446  
447  
448

Flowflex=Acon Labs Flowflex COVID-19 Antigen Home Test; MPBio=MP Biomedicals Rapid SARS-CoV-2 Antigen Test Card; Clinitest=Siemens-Healthineers CLINITEST Rapid COVID-19 Antigen Test; SD=standard deviation.

<sup>#</sup> Individuals could report more than one reason for testing, or more than one symptom, respectively. Participants were asked separately whether they had symptoms on the day of study participation. All participants reported symptoms but only 60-65% reported having symptoms as a reason for testing.

<sup>§</sup> Percentage calculated as proportion of those vaccinated, or those that had previous experience in performing a self-test, respectively.

449 **Table 2 Diagnostic accuracy parameters for the three Ag-RDTs in symptomatic individuals in the**  
 450 **Omicron period. Values are percentages (95% confidence interval) unless stated otherwise.**  
 451

|                                             | Sampling | N   | RT-PCR test positivity* [%] | Sensitivity [%] (95%CI) | Specificity [%] (95%CI) | PPV [%] (95%CI)  | NPV [%] (95%CI)  |
|---------------------------------------------|----------|-----|-----------------------------|-------------------------|-------------------------|------------------|------------------|
| <b>Flowflex</b>                             |          |     |                             |                         |                         |                  |                  |
| Primary analysis                            | N        | 620 | 66.0                        | 79.0 (74.7-82.8)        | 97.2 (93.9-98.9)        | 98.2 (96.1-99.3) | 70.4 (64.8-75.6) |
| Secondary (stratified) analyses:            |          |     |                             |                         |                         |                  |                  |
| Viral load cut-off¶                         | N        | 620 | 58.2                        | 85.6 (81.5-89.1)        | 92.3 (88.3-95.2)        | 93.9 (90.8-96.2) | 82.1 (77.2-86.4) |
| Vaccinated (at least once):                 |          |     |                             |                         |                         |                  |                  |
| Yes                                         | N        | 545 | 64.2                        | 78.6 (73.9-82.8)        | 96.9 (93.4-98.9)        | 97.9 (95.4-99.2) | 71.6 (65.7-77.0) |
| No                                          | N        | 75  | 78.7                        | 81.4 (69.1-90.3)        | 100 (79.4-100)          | 100 (92.6-100)   | 59.3 (38.8-77.6) |
| Previous SARS-CoV-2 infection:              |          |     |                             |                         |                         |                  |                  |
| Yes                                         | N        | 148 | 63.5                        | 67.0 (56.6-76.4)        | 98.1 (90.1-100)         | 98.4 (91.6-100)  | 63.1 (51.9-73.4) |
| No                                          | N        | 472 | 66.7                        | 82.5 (77.9-86.6)        | 96.8 (92.7-99.0)        | 98.1 (95.7-99.4) | 73.4 (66.9-79.3) |
| Sex:                                        |          |     |                             |                         |                         |                  |                  |
| Female                                      | N        | 357 | 63.9                        | 75.0 (68.9-80.5)        | 98.4 (94.5-99.8)        | 98.8 (95.9-99.9) | 69.0 (61.8-75.6) |
| Male                                        | N        | 260 | 68.5                        | 83.7 (77.4-88.8)        | 95.1 (88.0-98.7)        | 97.4 (93.4-99.3) | 72.9 (63.4-81.0) |
| Age [years]:                                |          |     |                             |                         |                         |                  |                  |
| 16-40                                       | N        | 385 | 66.0                        | 79.1 (73.6-84.0)        | 96.2 (94.4-99.2)        | 97.6 (94.4-99.2) | 70.4 (63.1-77.0) |
| >40                                         | N        | 235 | 66.0                        | 78.7 (71.4-84.9)        | 98.8 (93.2-100)         | 99.2 (95.6-100)  | 70.5 (61.2-78.8) |
| Reason for testing was positive self-test:  |          |     |                             |                         |                         |                  |                  |
| Yes                                         | N        | 279 | 94.6                        | 93.6 (89.9-96.2)        | 80.0 (51.9-95.7)        | 98.8 (96.5-99.8) | 41.4 (23.5-61.1) |
| No                                          | N        | 341 | 42.5                        | 52.4 (44.0-60.8)        | 98.5 (95.6-99.7)        | 96.2 (89.3-99.2) | 73.7 (67.9-78.9) |
| <b>MPBio</b>                                |          |     |                             |                         |                         |                  |                  |
| Primary analysis                            | N        | 820 | 48.2                        | 69.9 (65.1-74.4)        | 98.8 (97.3-99.6)        | 98.2 (95.9-99.4) | 77.9 (74.2-81.4) |
|                                             | OP-N     | 543 | 67.2                        | 83.0 (78.8-86.7)        | 97.8 (94.3-99.4)        | 98.7 (94.3-99.4) | 73.7 (67.6-79.2) |
| Secondary (stratified) analyses:            |          |     |                             |                         |                         |                  |                  |
| Viral load cut-off¶                         | N        | 819 | 41.5                        | 78.5 (73.8-82.8)        | 97.1 (95.1-98.4)        | 95.0 (91.8-97.2) | 86.4 (83.2-89.2) |
|                                             | OP-N     | 543 | 58.0                        | 89.8 (86.0-92.9)        | 89.5 (84.7-93.1)        | 92.2 (88.6-94.9) | 86.4 (81.4-90.5) |
| Vaccinated (at least one):                  |          |     |                             |                         |                         |                  |                  |
| Yes                                         | N        | 752 | 47.7                        | 68.2 (63.2-73.0)        | 99.2 (97.8-99.8)        | 98.8 (96.5-99.7) | 77.4 (73.5-81.0) |
|                                             | OP-N     | 487 | 66.9                        | 82.5 (77.9-86.5)        | 97.5 (93.8-99.3)        | 98.5 (96.3-99.6) | 73.4 (66.9-79.2) |
| No                                          | N        | 68  | 52.9                        | 86.1 (70.5-95.3)        | 93.8 (79.2-99.2)        | 93.9 (79.8-99.3) | 85.7 (69.7-95.2) |
|                                             | OP-N     | 56  | 69.6                        | 87.2 (72.6-95.7)        | 100 (80.5-100)          | 100 (89.7-100)   | 77.3 (54.6-92.2) |
| Previous SARS-CoV-2 infection:              |          |     |                             |                         |                         |                  |                  |
| Yes                                         | N        | 185 | 35.7                        | 60.6 (47.8-72.4)        | 100 (96.9-100)          | 100 (91.2-100)   | 82.1 (74.8-87.9) |
|                                             | OP-N     | 135 | 65.2                        | 85.2 (76.1-91.9)        | 97.9 (88.7-99.9)        | 98.7 (92.9-100)  | 78.0 (65.3-87.7) |
| No                                          | N        | 634 | 51.9                        | 71.7 (66.5-76.5)        | 98.4 (96.2-99.5)        | 97.9 (95.2-99.3) | 76.3 (71.8-80.5) |
|                                             | OP-N     | 408 | 67.9                        | 82.3 (77.3-86.6)        | 97.7 (93.5-99.5)        | 98.7 (96.3-99.7) | 72.3 (65.1-78.8) |
| Sex:                                        |          |     |                             |                         |                         |                  |                  |
| Female                                      | N        | 524 | 45.0                        | 70.3 (64.1-76.1)        | 99.0 (97.0-99.8)        | 98.2 (94.9-99.6) | 80.3 (75.8-84.3) |
|                                             | OP-N     | 375 | 65.3                        | 82.4 (77.1-87.0)        | 97.7 (93.4-99.5)        | 98.5 (95.8-99.7) | 74.7 (67.5-81.0) |
| Male                                        | N        | 295 | 53.9                        | 69.2 (61.4-76.3)        | 98.5 (94.8-99.8)        | 98.2 (93.7-99.8) | 73.2 (66.2-79.5) |
|                                             | OP-N     | 166 | 71.1                        | 83.9 (76.0-80.0)        | 97.9 (88.9-99.9)        | 99.0 (94.6-100)  | 71.2 (58.7-81.7) |
| Age [years]:                                |          |     |                             |                         |                         |                  |                  |
| 16-40                                       | N        | 475 | 49.5                        | 75.3 (69.3-80.7)        | 99.2 (97.0-99.9)        | 98.9 (96.0-99.9) | 80.4 (75.4-84.8) |
|                                             | OP-N     | 335 | 68.4                        | 82.5 (77.0-87.2)        | 97.2 (92.0-99.4)        | 98.4 (95.5-99.7) | 72.0 (63.9-79.2) |
| >40                                         | N        | 345 | 46.4                        | 61.9 (53.9-69.4)        | 98.4 (95.3-99.7)        | 97.1 (91.6-99.4) | 74.9 (69.0-80.2) |
|                                             | OP-N     | 208 | 65.4                        | 83.8 (76.5-89.6)        | 98.6 (92.5-100)         | 99.1 (95.3-100)  | 76.3 (66.4-84.5) |
| Reasons for testing was positive self-test: |          |     |                             |                         |                         |                  |                  |
| Yes                                         | N        | 239 | 94.6                        | 83.6 (78.1-88.2)        | 84.6 (54.6-98.1)        | 99.0 (96.3-99.9) | 22.9 (12.0-37.3) |
|                                             | OP-N     | 288 | 96.2                        | 87.4 (82.9-91.0)        | 90.9 (58.7-99.8)        | 99.6 (97.7-100)  | 22.2 (11.2-37.1) |
| No                                          | N        | 581 | 29.1                        | 51.5 (43.7-59.2)        | 99.3 (97.9-99.8)        | 96.7 (90.6-99.3) | 83.3 (79.7-86.5) |
|                                             | OP-N     | 255 | 34.5                        | 69.3 (58.6-78.7)        | 98.2 (94.8-99.6)        | 95.3 (86.9-99.0) | 85.9 (80.1-90.5) |
| <b>Clintest</b>                             |          |     |                             |                         |                         |                  |                  |
| Primary analysis                            | N        | 726 | 59.1                        | 70.2 (65.6-74.5)        | 99.3 (97.6-99.9)        | 99.3 (97.6-99.9) | 69.7 (65.1-74.1) |
|                                             | OP-N     | 653 | 64.6                        | 77.3 (72.9-81.2)        | 97.0 (93.9-98.8)        | 97.9 (95.7-99.2) | 70.0 (64.7-75.0) |
| Secondary (stratified) analyses:            |          |     |                             |                         |                         |                  |                  |
| Viral load cut-off¶                         | N        | 711 | 52.0                        | 77.0 (72.4-81.2)        | 97.4 (95.0-98.8)        | 96.9 (94.3-98.6) | 79.6 (75.4-83.4) |
|                                             | OP-N     | 653 | 57.3                        | 83.7 (79.5-87.3)        | 92.8 (89.1-95.6)        | 94.0 (90.9-96.3) | 80.9 (76.2-85.1) |
| Vaccinated (at least one):                  |          |     |                             |                         |                         |                  |                  |
| Yes                                         | N        | 635 | 58.6                        | 68.5 (63.6-73.2)        | 100 (98.6-100)          | 100 (98.6-100)   | 69.2 (64.3-73.8) |
|                                             | OP-N     | 586 | 64.7                        | 77.0 (72.5-81.2)        | 98.1 (95.1-99.5)        | 98.6 (96.6-99.6) | 70.0 (64.4-75.2) |
| No                                          | N        | 90  | 63.3                        | 80.7 (68.1-90.0)        | 93.9 (79.8-99.3)        | 95.8 (85.7-99.5) | 73.8 (58.0-86.1) |
|                                             | OP-N     | 66  | 65.2                        | 79.1 (64.0-90.0)        | 91.3 (72.0-98.9)        | 94.4 (81.3-99.3) | 70.0 (50.6-85.3) |
| Previous SARS-CoV-2 infection:              |          |     |                             |                         |                         |                  |                  |
| Yes                                         | N        | 127 | 49.6                        | 60.3 (47.2-72.4)        | 96.9 (89.2-99.6)        | 95.0 (83.1-99.4) | 71.3 (60.6-80.5) |
|                                             | OP-N     | 121 | 49.6                        | 66.7 (53.3-78.3)        | 95.1 (86.3-99.0)        | 93.0 (80.9-98.5) | 74.4 (63.2-83.6) |
| No                                          | N        | 599 | 61.1                        | 71.9 (66.9-76.4)        | 100 (98.4-100)          | 100 (98.6-100)   | 69.3 (64.1-74.2) |
|                                             | OP-N     | 532 | 68.0                        | 79.0 (74.4-83.1)        | 97.6 (94.1-99.4)        | 98.6 (96.5-99.6) | 68.6 (62.3-74.4) |
| Sex:                                        |          |     |                             |                         |                         |                  |                  |
| Female                                      | N        | 449 | 57.7                        | 65.3 (59.1-71.0)        | 98.9 (96.2-99.9)        | 98.8 (95.8-99.9) | 67.6 (61.8-73.1) |
|                                             | OP-N     | 437 | 60.2                        | 74.9 (69.2-80.0)        | 96.6 (92.6-98.7)        | 97.0 (93.7-98.9) | 71.8 (65.6-77.5) |
| Male                                        | N        | 276 | 61.2                        | 77.5 (70.5-83.6)        | 100 (96.6-100)          | 100 (97.2-100)   | 73.8 (65.8-80.7) |

|                                            |      |     |      |                  |                  |                  |                  |
|--------------------------------------------|------|-----|------|------------------|------------------|------------------|------------------|
|                                            | OP-N | 213 | 73.7 | 80.9 (73.9-86.7) | 98.2 (90.4-100)  | 99.2 (95.7-100)  | 64.7 (53.6-74.8) |
| Age [years]:                               |      |     |      |                  |                  |                  |                  |
| 16-40                                      | N    | 385 | 62.1 | 71.1 (64.9-76.8) | 99.3 (96.2-100)  | 99.4 (96.8-100)  | 67.8 (61.0-74.0) |
|                                            | OP-N | 339 | 64.9 | 79.1 (73.1-84.3) | 96.6 (91.6-99.1) | 97.8 (94.3-99.4) | 71.4 (63.8-78.3) |
| >40                                        | N    | 341 | 55.7 | 68.9 (61.8-75.4) | 99.3 (96.4-100)  | 99.2 (95.9-100)  | 71.8 (65.1-77.8) |
|                                            | OP-N | 313 | 64.5 | 75.2 (68.7-81.0) | 97.3 (92.3-99.4) | 98.1 (94.4-99.6) | 68.4 (60.5-75.5) |
| Reason for testing was positive self-test: |      |     |      |                  |                  |                  |                  |
| Yes                                        | N    | 257 | 95.3 | 85.7 (80.7-89.8) | 91.7 (61.5-99.8) | 99.5 (97.4-100)  | 23.9 (12.6-38.8) |
|                                            | OP-N | 290 | 96.6 | 86.1 (81.5-89.9) | 80.0 (44.4-97.5) | 99.2 (97.1-99.9) | 17.0 (7.6-30.8)  |
| No                                         | N    | 469 | 39.2 | 49.5 (42.0-56.9) | 99.6 (98.1-100)  | 98.9 (94.1-100)  | 75.3 (70.7-79.6) |
|                                            | OP-N | 363 | 39.1 | 59.9 (51.3-68.0) | 97.7 (94.8-99.3) | 94.4 (87.5-98.2) | 79.1 (73.8-83.8) |

452 Flowflex=Acon Labs Flowflex COVID-19 Antigen Home Test; MPBio=MP Biomedicals Rapid SARS-CoV-2 Antigen Test Card;  
453 Clinitest=Siemens-Healthineers CLINITEST Rapid COVID-19 Antigen Test; NPV=negative predictive value; PPV=positive predictive  
454 value; N = nasal sampling; OP-N = combined oropharyngeal and nasal sampling.  
455 \*True SARS-CoV-2 infections based on RT-PCR test result.  
456 ¶ Defined as viral load above which 95% of individuals with a positive RT-PCR test result had a positive viral culture<sup>6</sup>, which was 5.2 log<sub>10</sub>  
457 SARS-CoV-2 E-gene copies/mL.  
458

459 **Figure legend**

460

461 **Figure 1** Flow of study participants in the omicron period, presented separately for nasal (top) and  
462 oropharyngeal plus nasal sampling (bottom). Flowflex = the Acon Labs Flowflex COVID-19 Antigen Home  
463 Test; MPBio = the MP Biomedicals Rapid SARS-CoV-2 Antigen Test Card; Clinitest = the Siemens-  
464 Healthineers CLINITEST Rapid COVID-19 Antigen Test. “Ag-RDT inconclusive” is a combination of Ag-  
465 RDTs that showed no control line, test tubes that were dropped, an Ag-RDTs that provided a result participants  
466 had difficulties to interpret (e.g., very light line at the “T”).

467

468 **Figure 2** Sensitivities with 95% confidence intervals of the antigen rapid test-RT-PCR reference standard test  
469 comparisons stratified according to COVID-19 vaccination status, previous infection status, sex, and age, with  
470 nasal sampling for all three tests (top) and oropharyngeal plus nasal sampling for MPBio and Clinitest (bottom).  
471 The vertical line indicates the sensitivity of the Ag-RDT in the respective overall study population, and the  
472 number of positive RT-PCR tests out of the total or subgroup between parentheses.

473

474 **Figure 3** Sensitivities (dots) and specificities (triangles) with 95% confidence intervals of the antigen rapid test  
475 with nasal sampling-RT-PCR reference standard test comparison by week of inclusion, before (left) and after  
476 application of a viral load cut-off (right). The red bars indicate the percentage of the Omicron variant according  
477 to the national pathogen surveillance, while the numbers indicate the number of participants included in each  
478 week.

479

480 **Acknowledgements**

481 We thank the participants, and study staff at the participating public health service test-sites, participating  
482 laboratories, the University Medical Center Utrecht, and RIVM for their contributions to the study. A special  
483 thanks to Esther Stiefelhagen, Renske Beekes, Sophie Neeleman, Eveline Westergaard, Roel Ensing, Wendy  
484 Mouthaan, and Timo Boelsums. Written permission was obtained from all five of them to list their names. ES,  
485 RB, SN, RE, WH, LB, and TB did not receive any compensation for their contributions.

486 **Contributors**

487 KGMM initiated the study. ES, RPV, LH, IKV, WvdB, SDP, EL, MH, RM, CW, IV, CRSN-I, SvdH, JAJWK,  
488 JHHMvdW, and KGMM designed the study. ES, RPV, CRSN-I, and KGMM coordinated the study. WvdB,  
489 SDP, VFZ, LS, and MK were responsible for laboratory analyses and data processing. ES, RPV, and KGMM  
490 verified the underlying data. ES performed the statistical analysis and verified the underlying data in close  
491 collaboration with RPV and KGMM. ES, RPV, JHHMvdW, and KGMM drafted the first version of the  
492 manuscript. All authors critically read the manuscript and provided feedback. All authors approved the  
493 submission of the current version of the manuscript. The corresponding author attests that all listed authors meet  
494 authorship criteria and that no others meeting the criteria have been omitted.

495 **Declaration of interest**

496 All authors have completed the ICMJE uniform disclosure form at [www.icmje.org/coi\\_disclosure.pdf](http://www.icmje.org/coi_disclosure.pdf) and  
497 declare: support from the Dutch Ministry of Health, Welfare, and Sport for the submitted work; no financial  
498 relationships with any organisations that might have an interest in the submitted work in the previous three years;  
499 no other relationships or activities that could appear to have influenced the submitted work.

500 **Ethical approval**

501 Not required because the study was judged by the METC Utrecht to be outside the scope of the Dutch Medical  
502 Research Involving Human Subjects Act (protocol No 21-818 /C). All participants signed an informed consent  
503 form before any study procedure.

504 **Data sharing**

505 Individual participant data collected during the study will be available, after deidentification of all participants.  
506 Data will be available to researchers who provide a methodologically sound proposal to achieve the aims in the  
507 approved proposal. Proposals should be directed to the corresponding author to gain access to the data. Data  
508 requestors will need to sign a data sharing agreement.

509 The corresponding author (KGMM, the manuscript's guarantor) affirms that the manuscript is an honest,

510 accurate, and transparent account of the study being reported; that no important aspects of the study have been  
511 omitted; and that any discrepancies from the study as originally planned (and, if relevant, registered) have been  
512 explained.

513 **Additional information**

514 The study protocol is available upon request by contacting Karel Moons at [k.g.m.moons@umcutrecht.nl](mailto:k.g.m.moons@umcutrecht.nl)

# Nasal sampling

## Flowflex (Rotterdam)

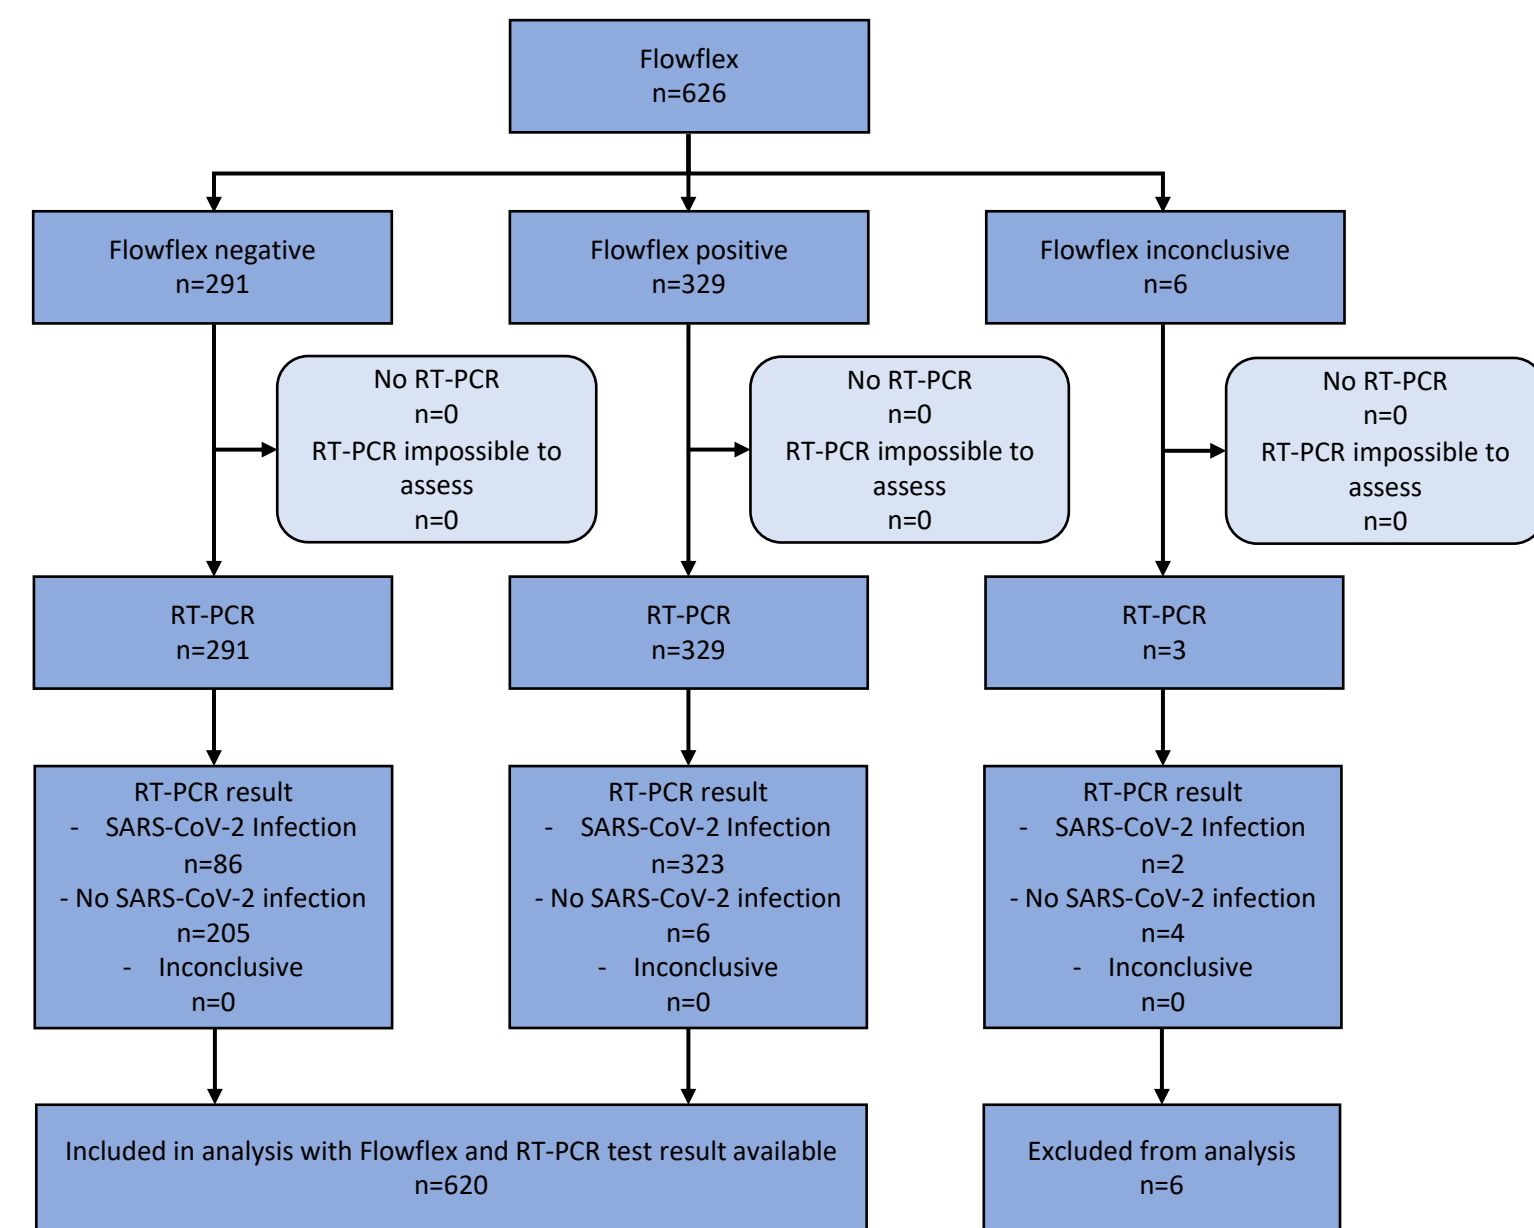

## MPBio (Tilburg)

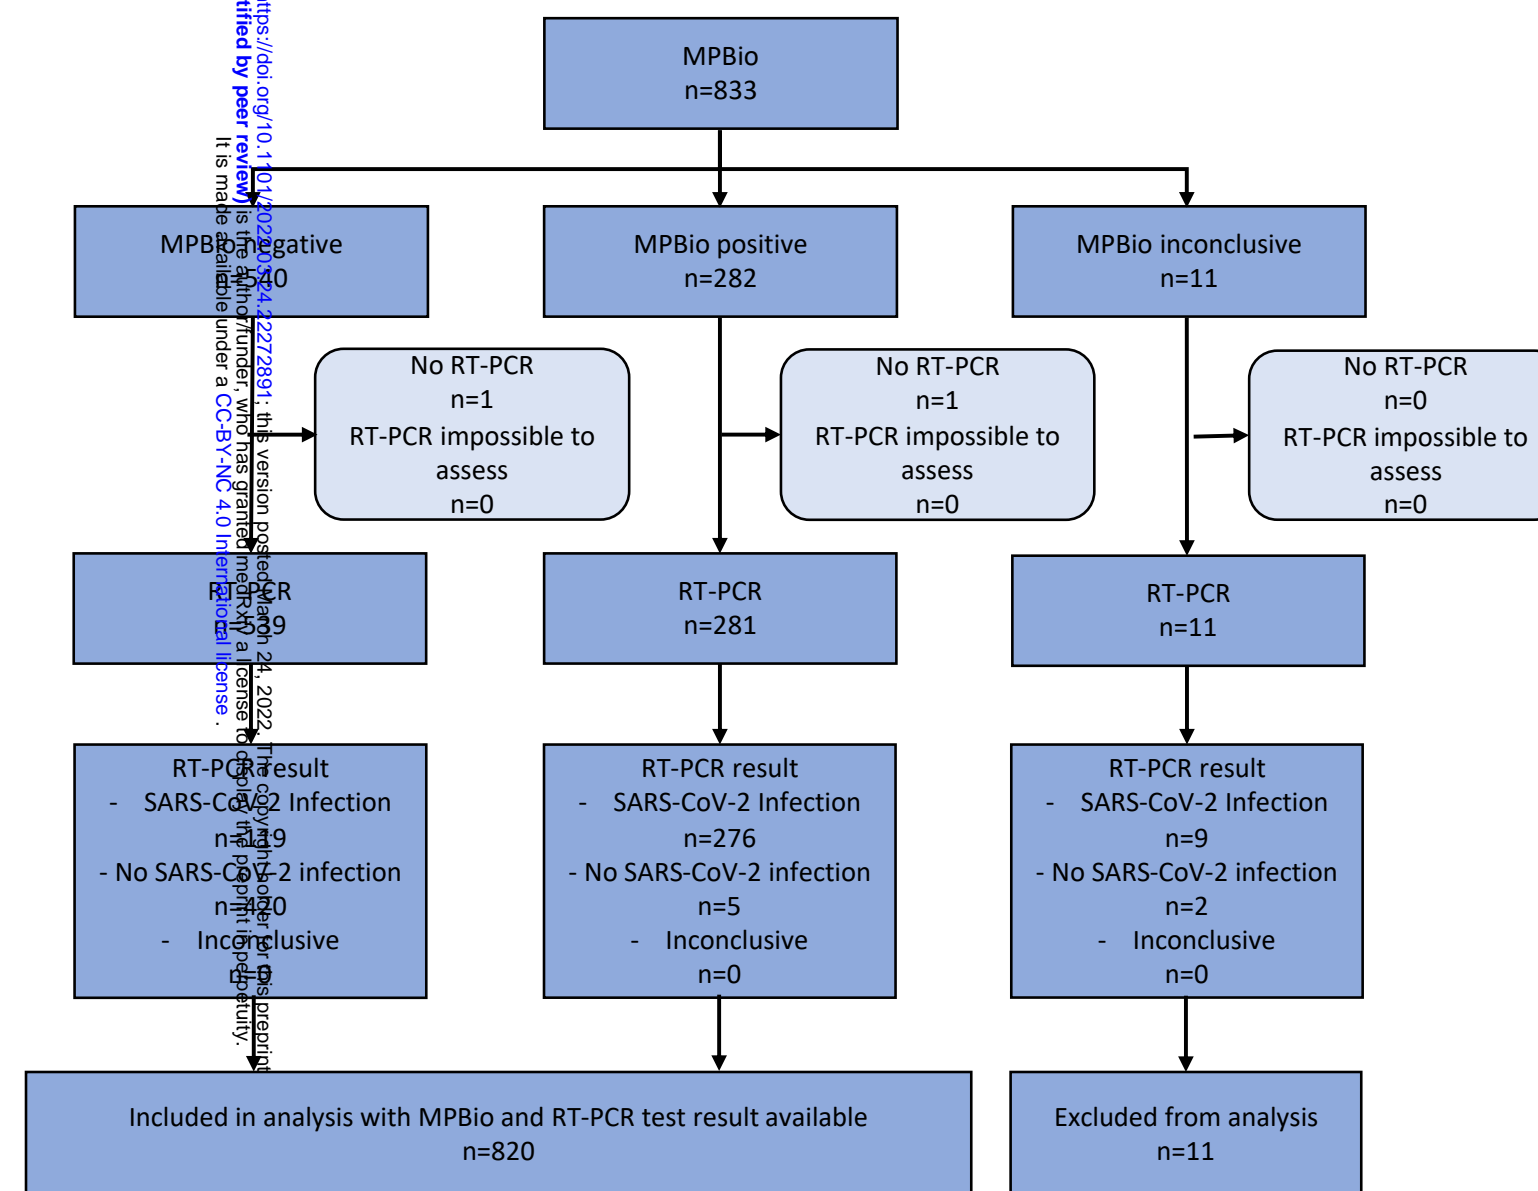

## Clinitest (Roosendaal)

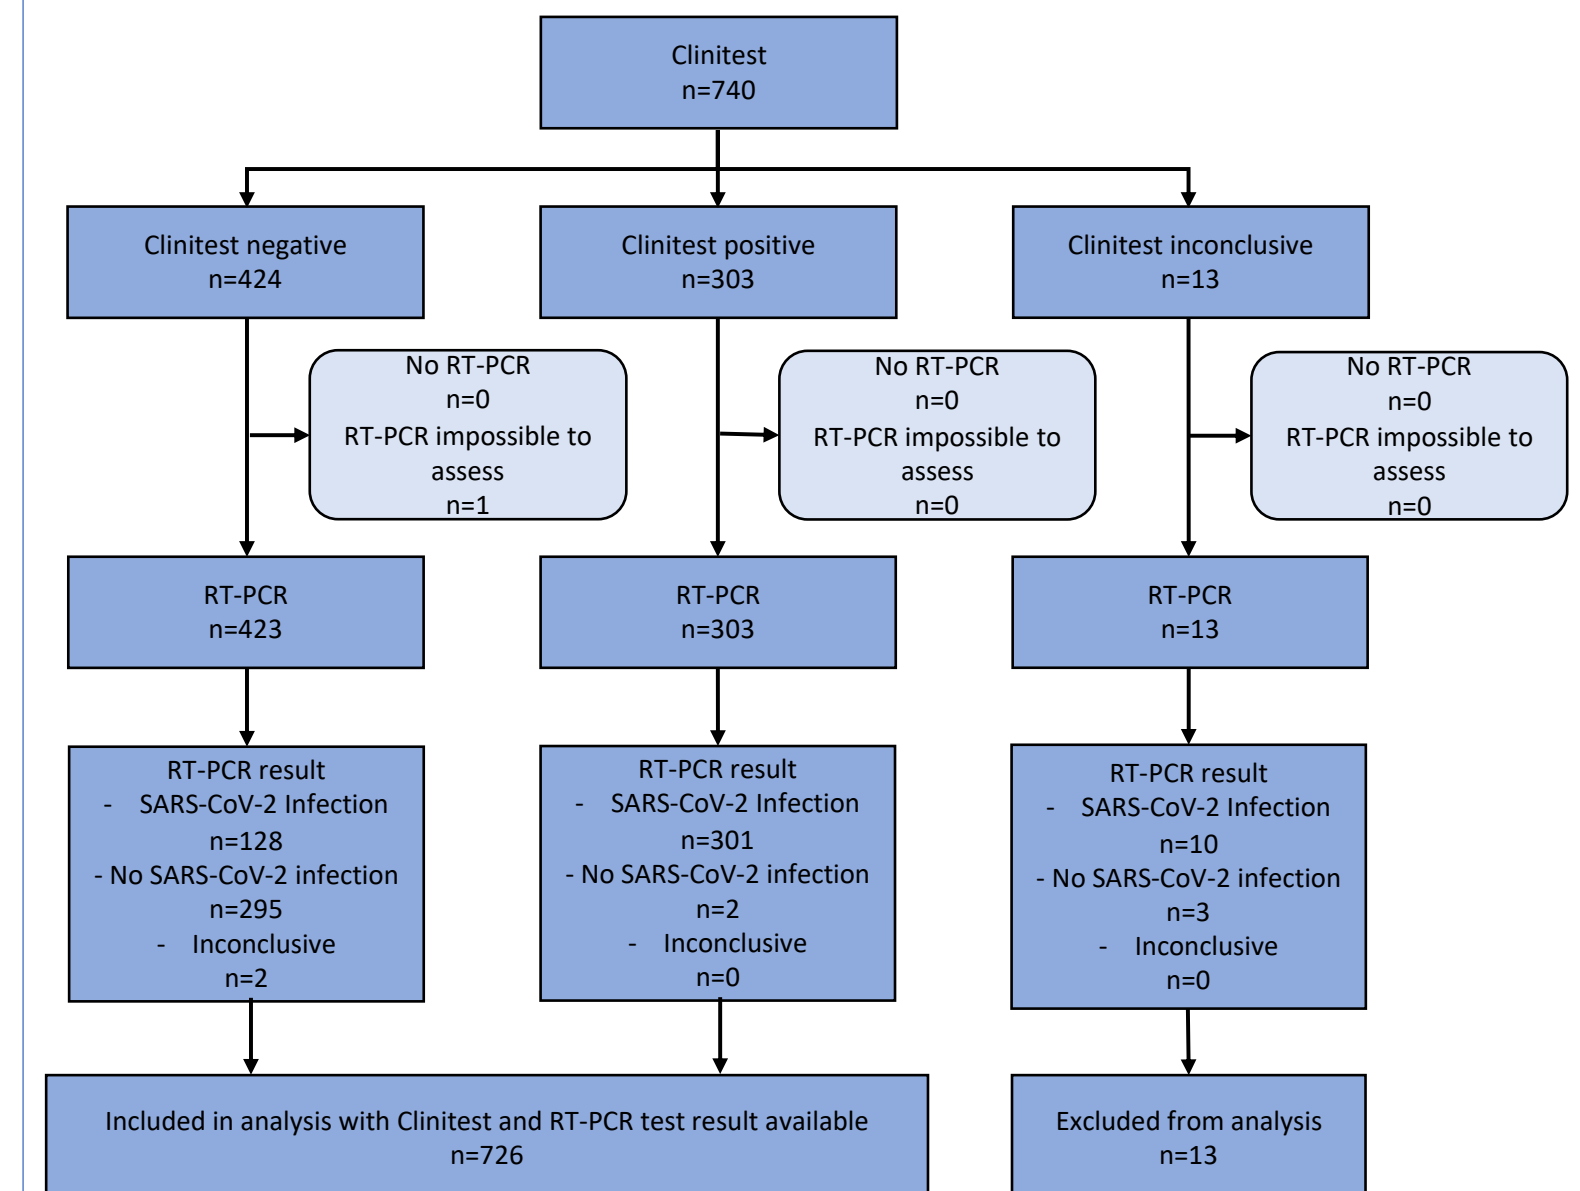

# Oropharyngeal and nasal sampling

## MPBio (Tilburg)

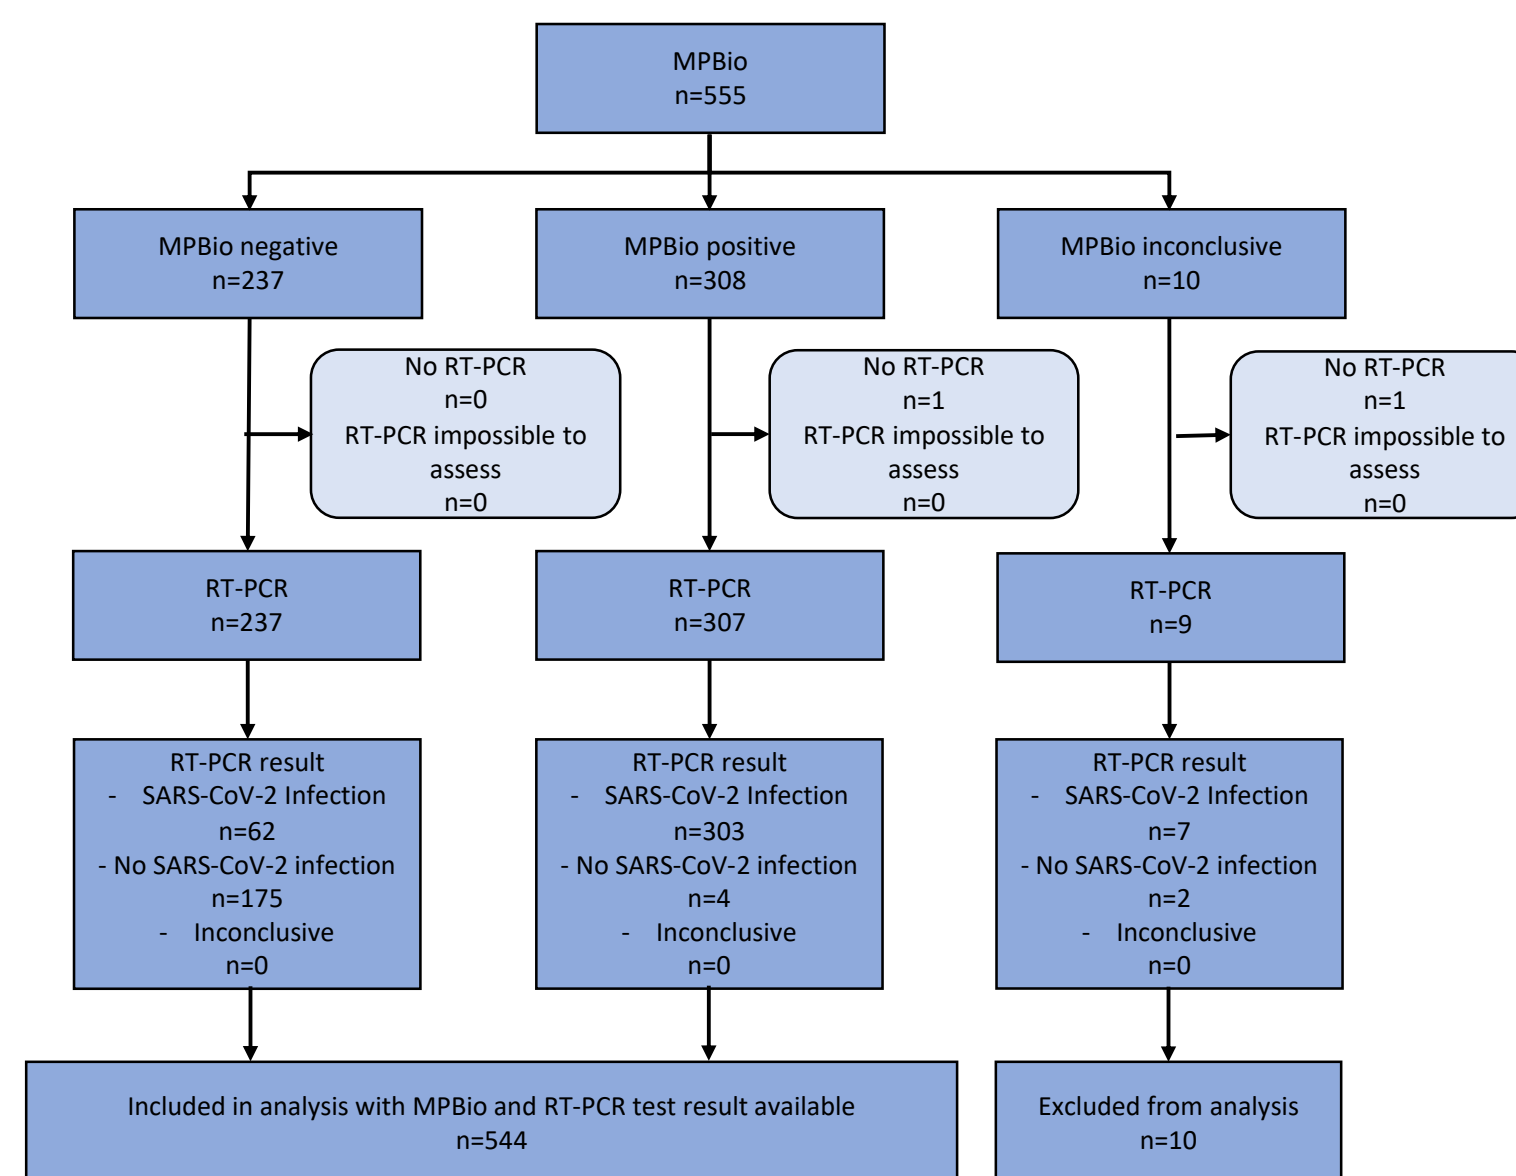

## Clinitest (Roosendaal)

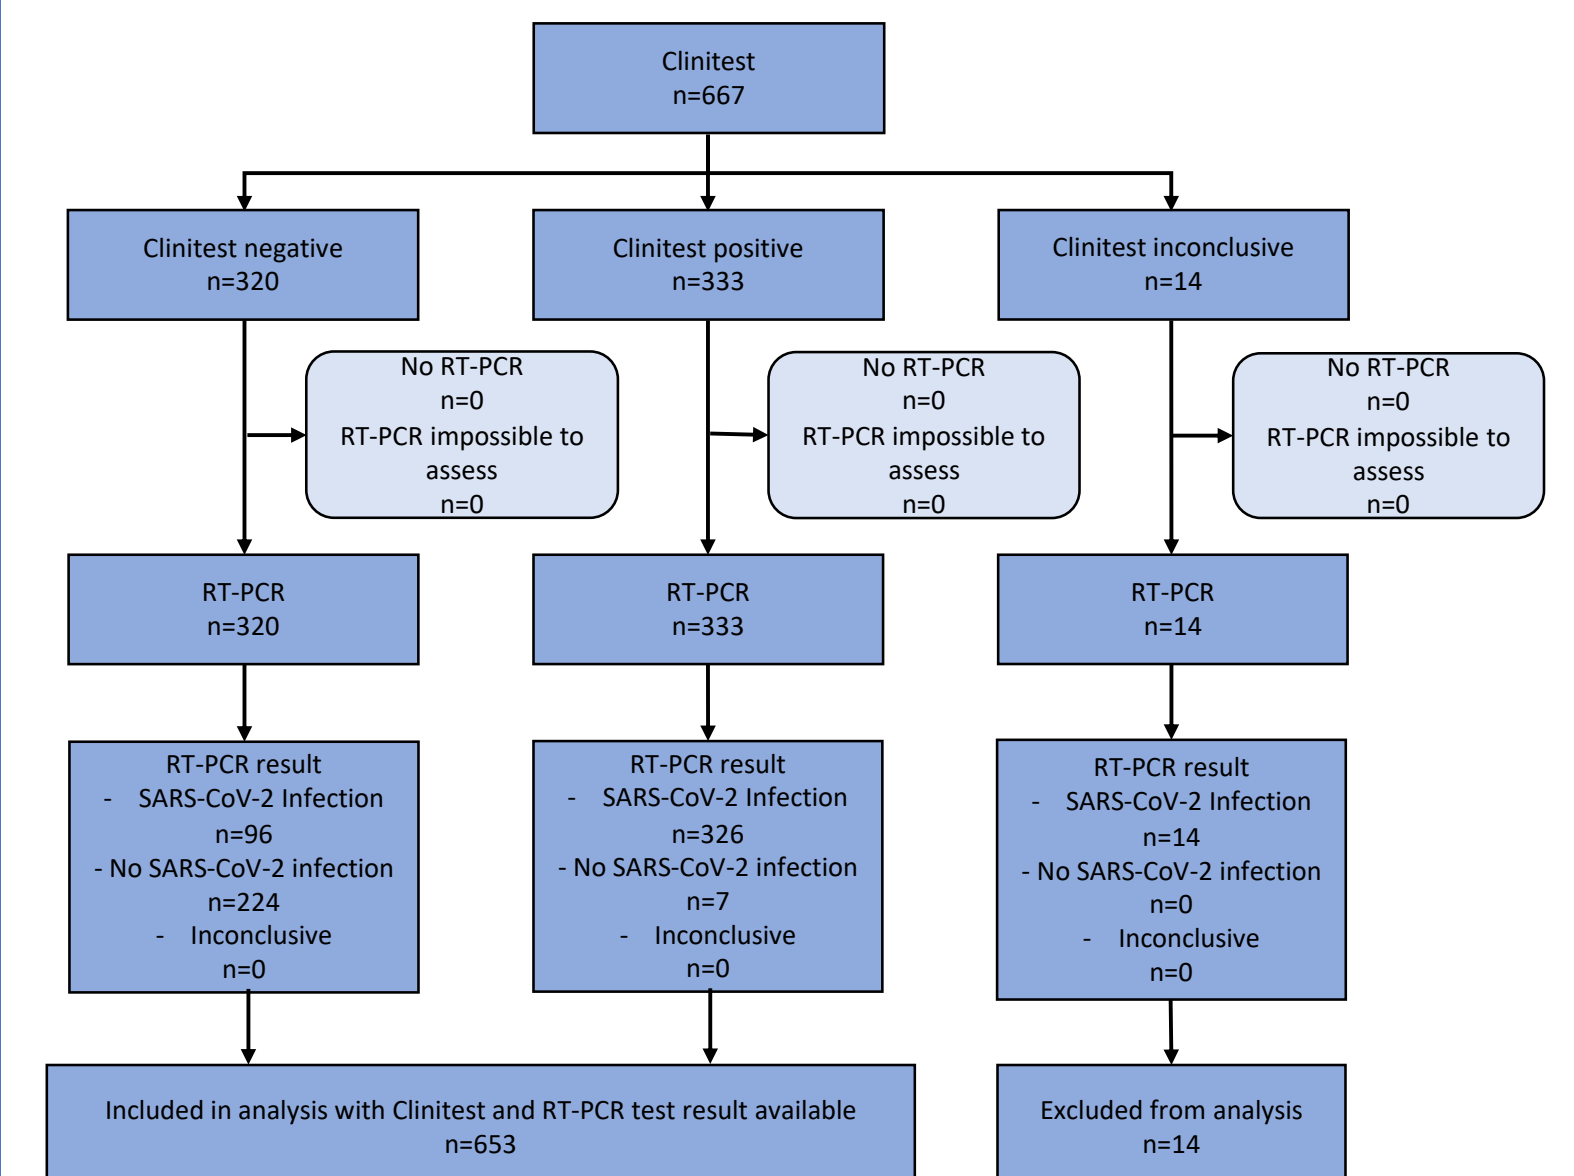



*Flowflex, nasal sampling*

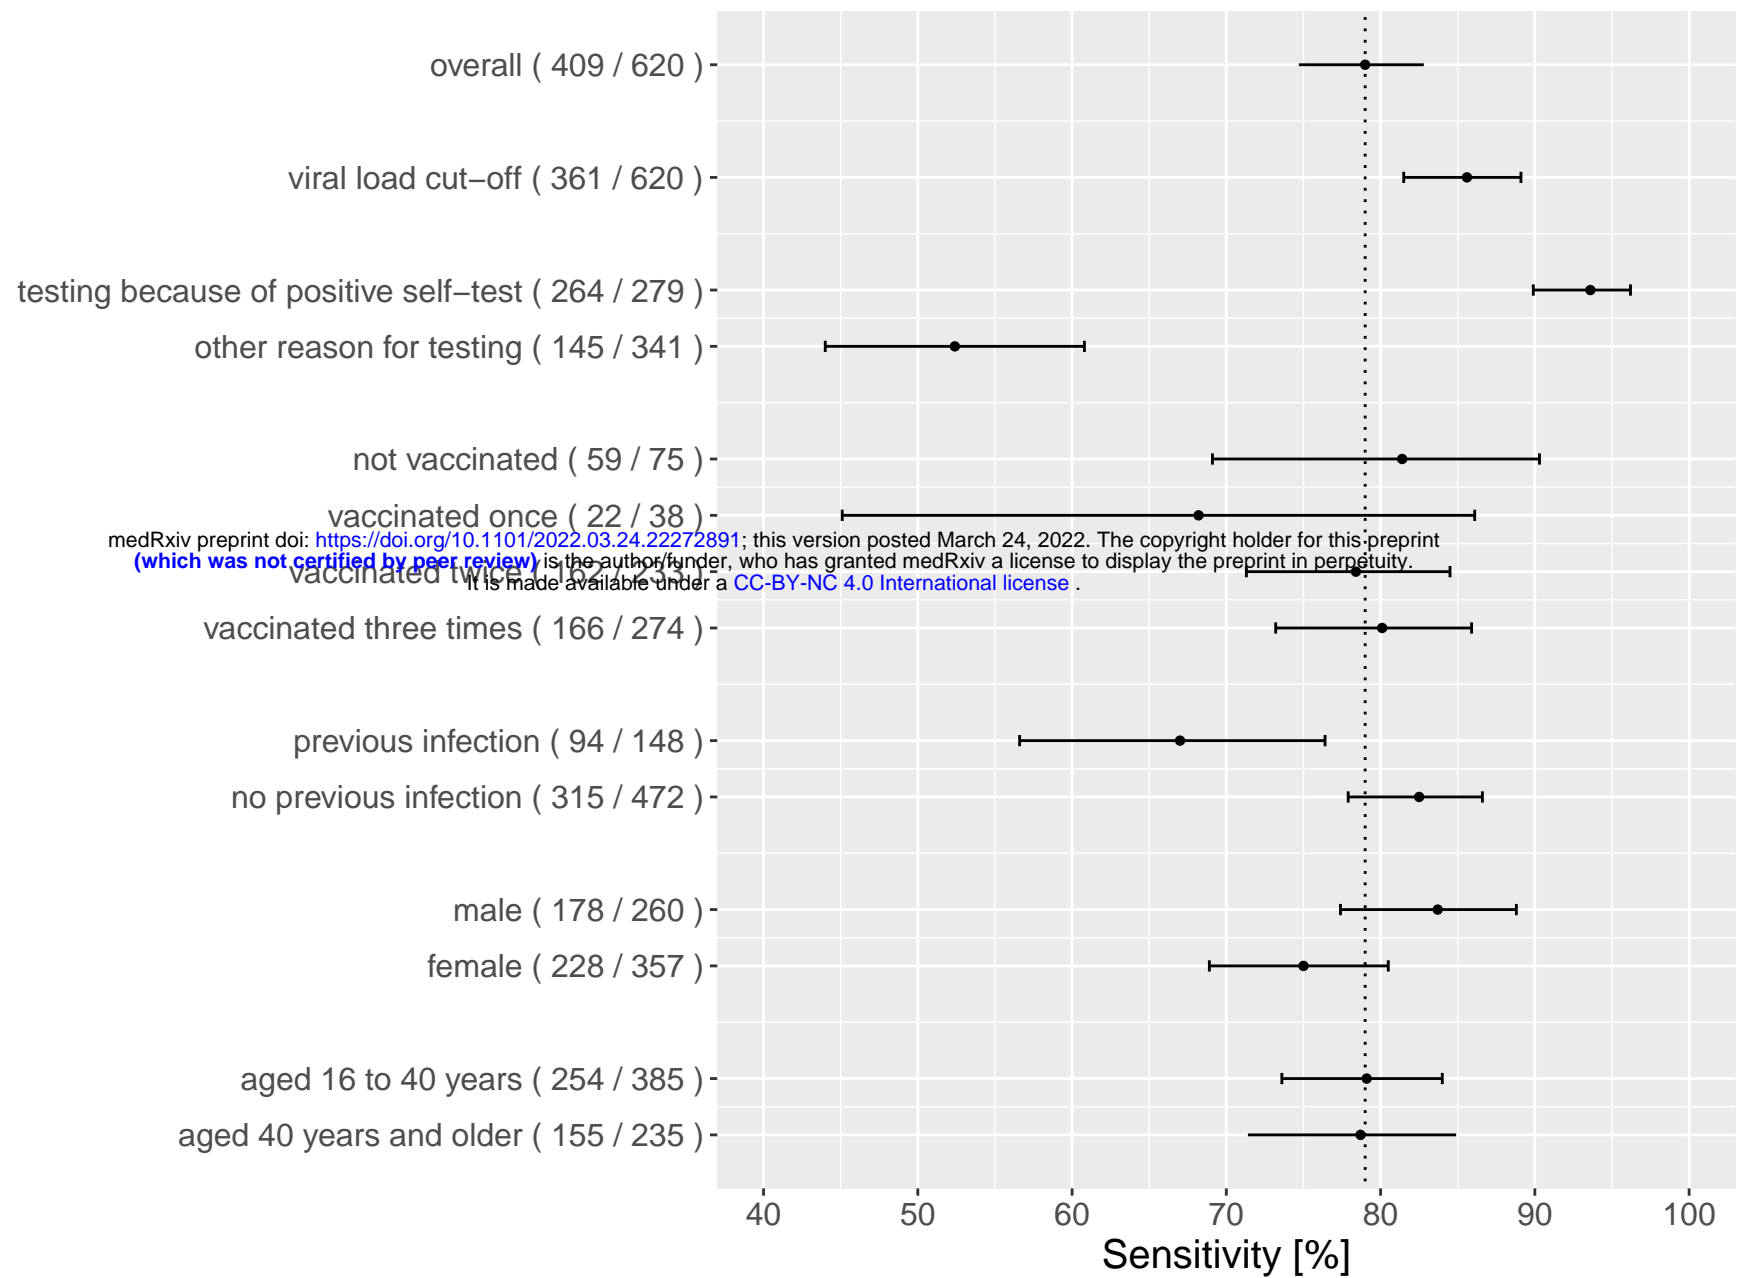

*MPBio, nasal sampling*

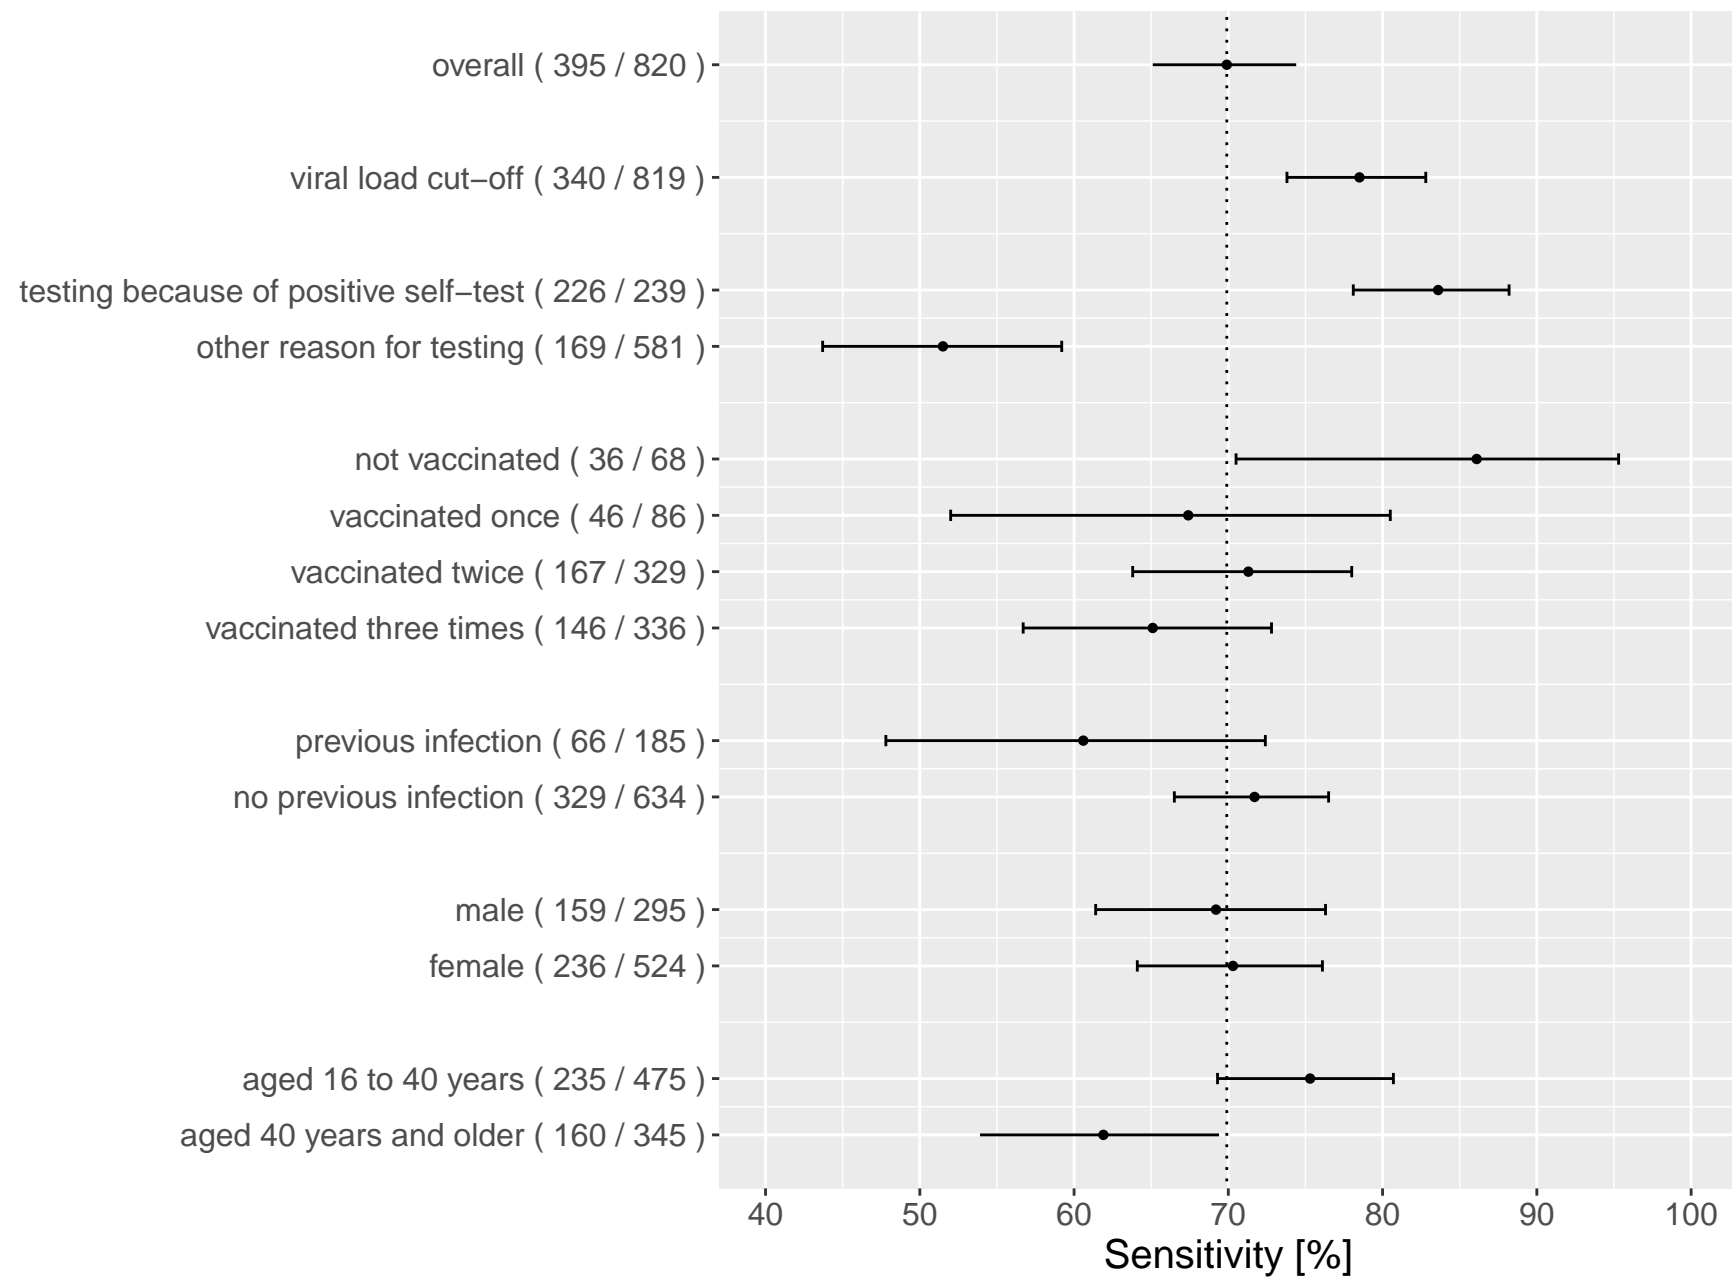

*Clinitest, nasal sampling*

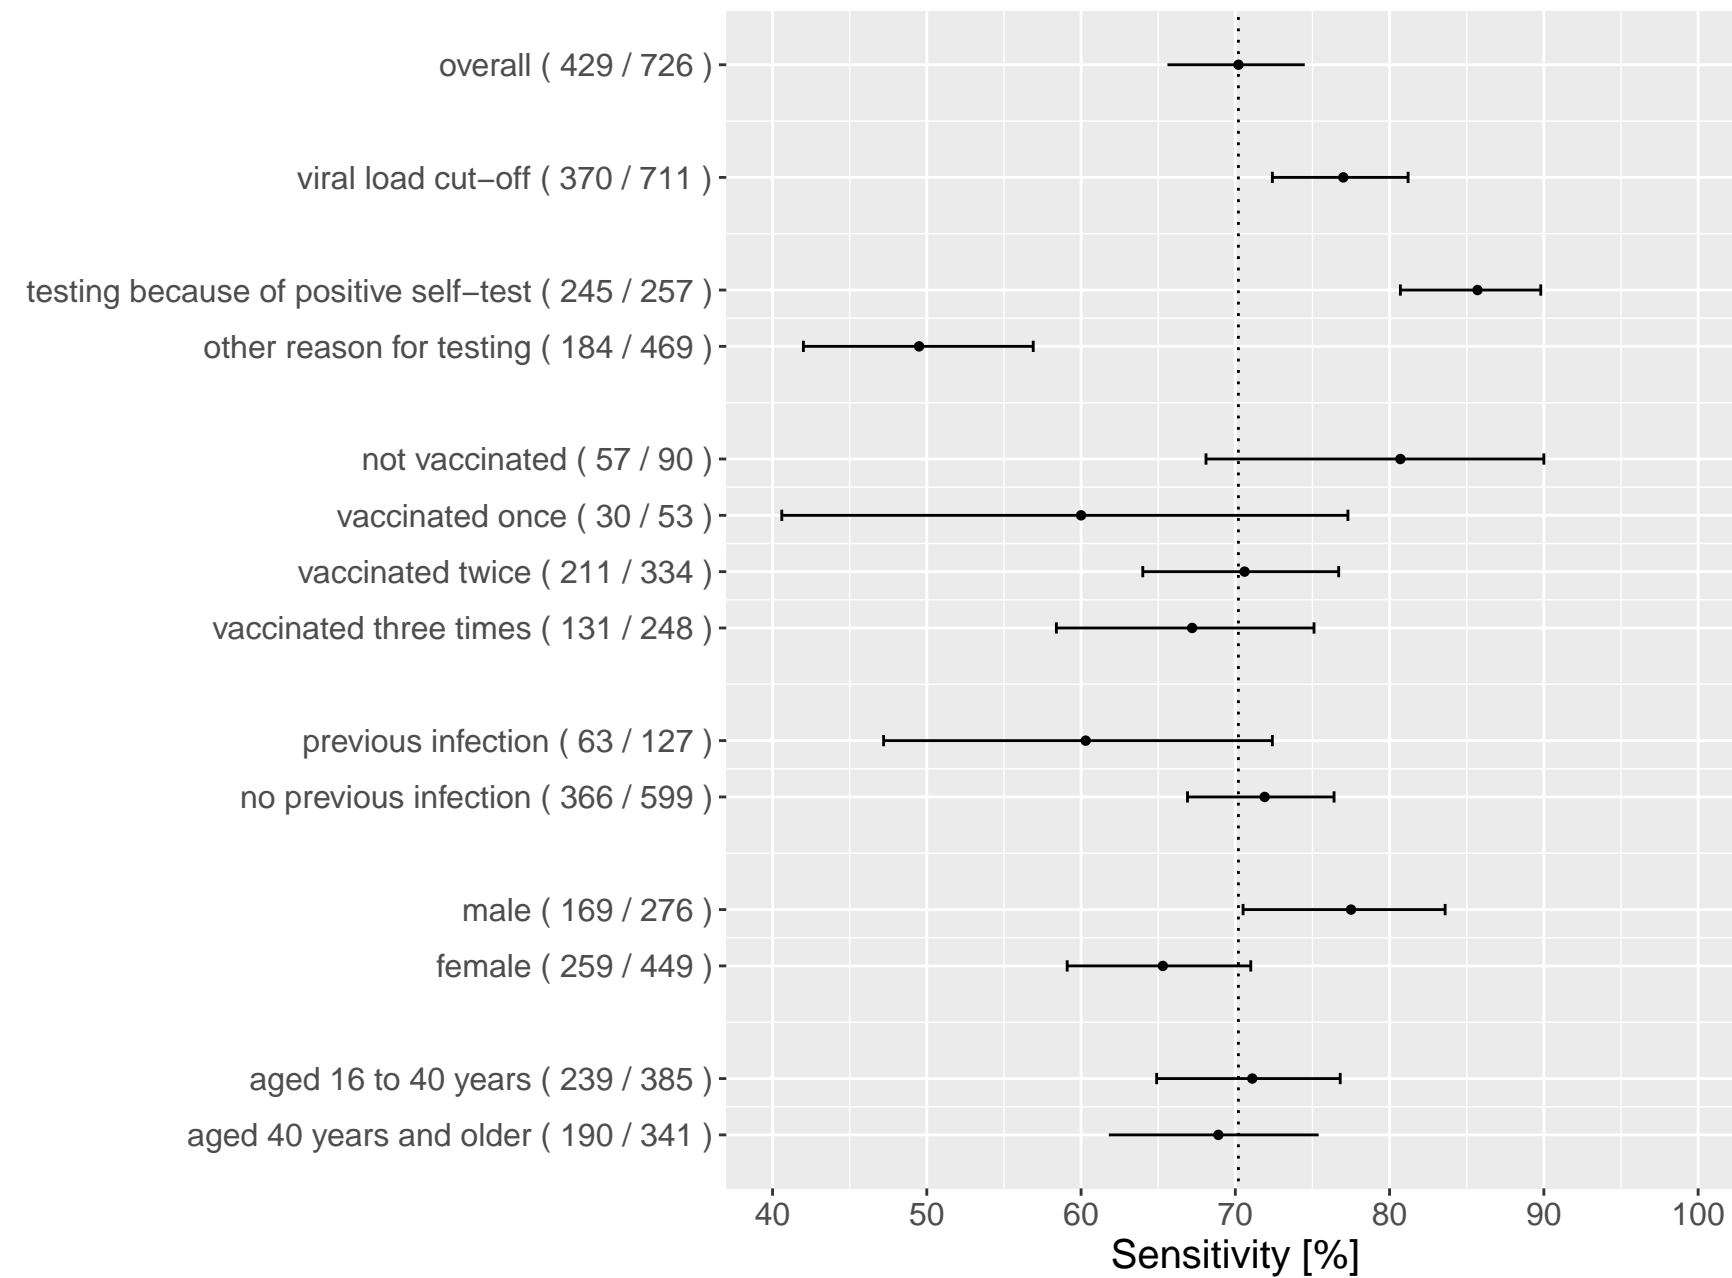

*MPBio, oropharyngeal-nasal sampling*

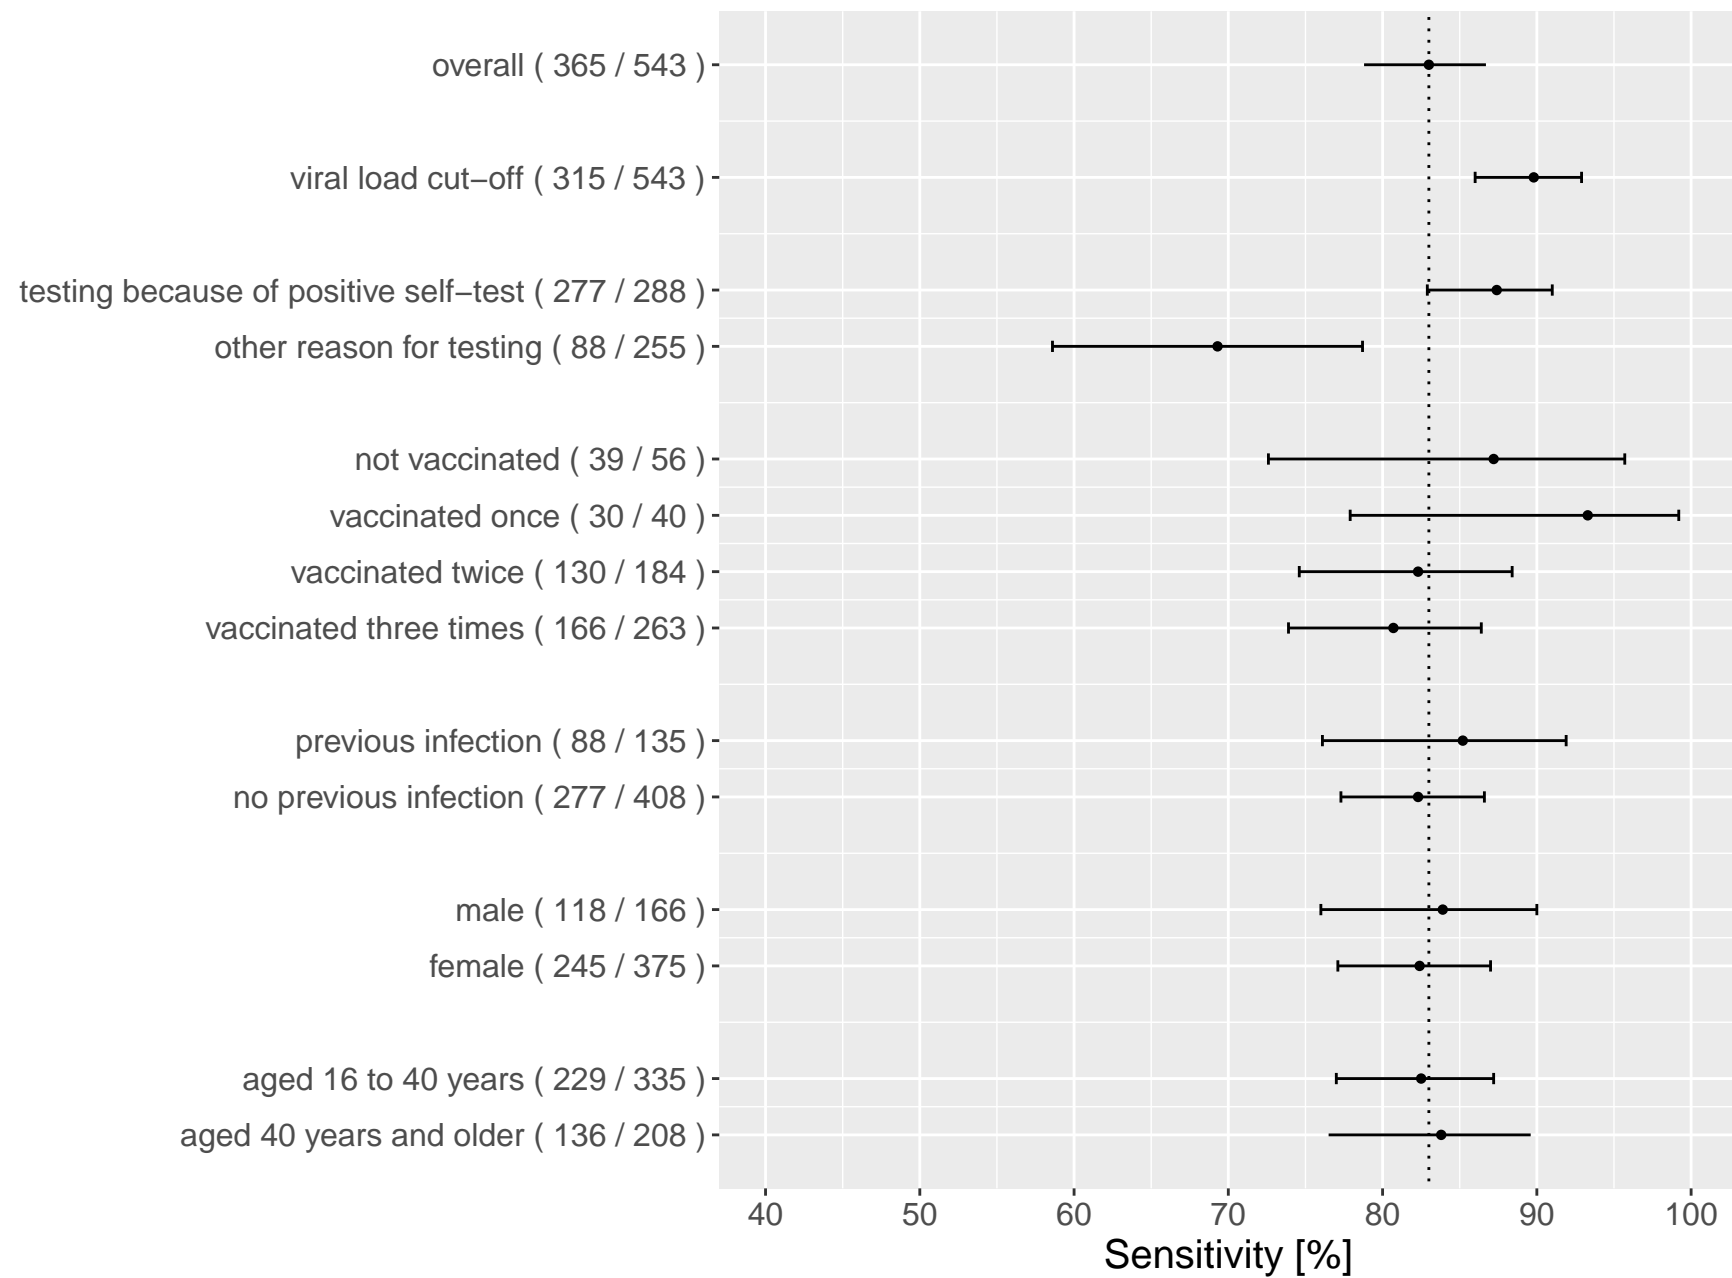

*Clinitest, oropharyngeal-nasal sampling*

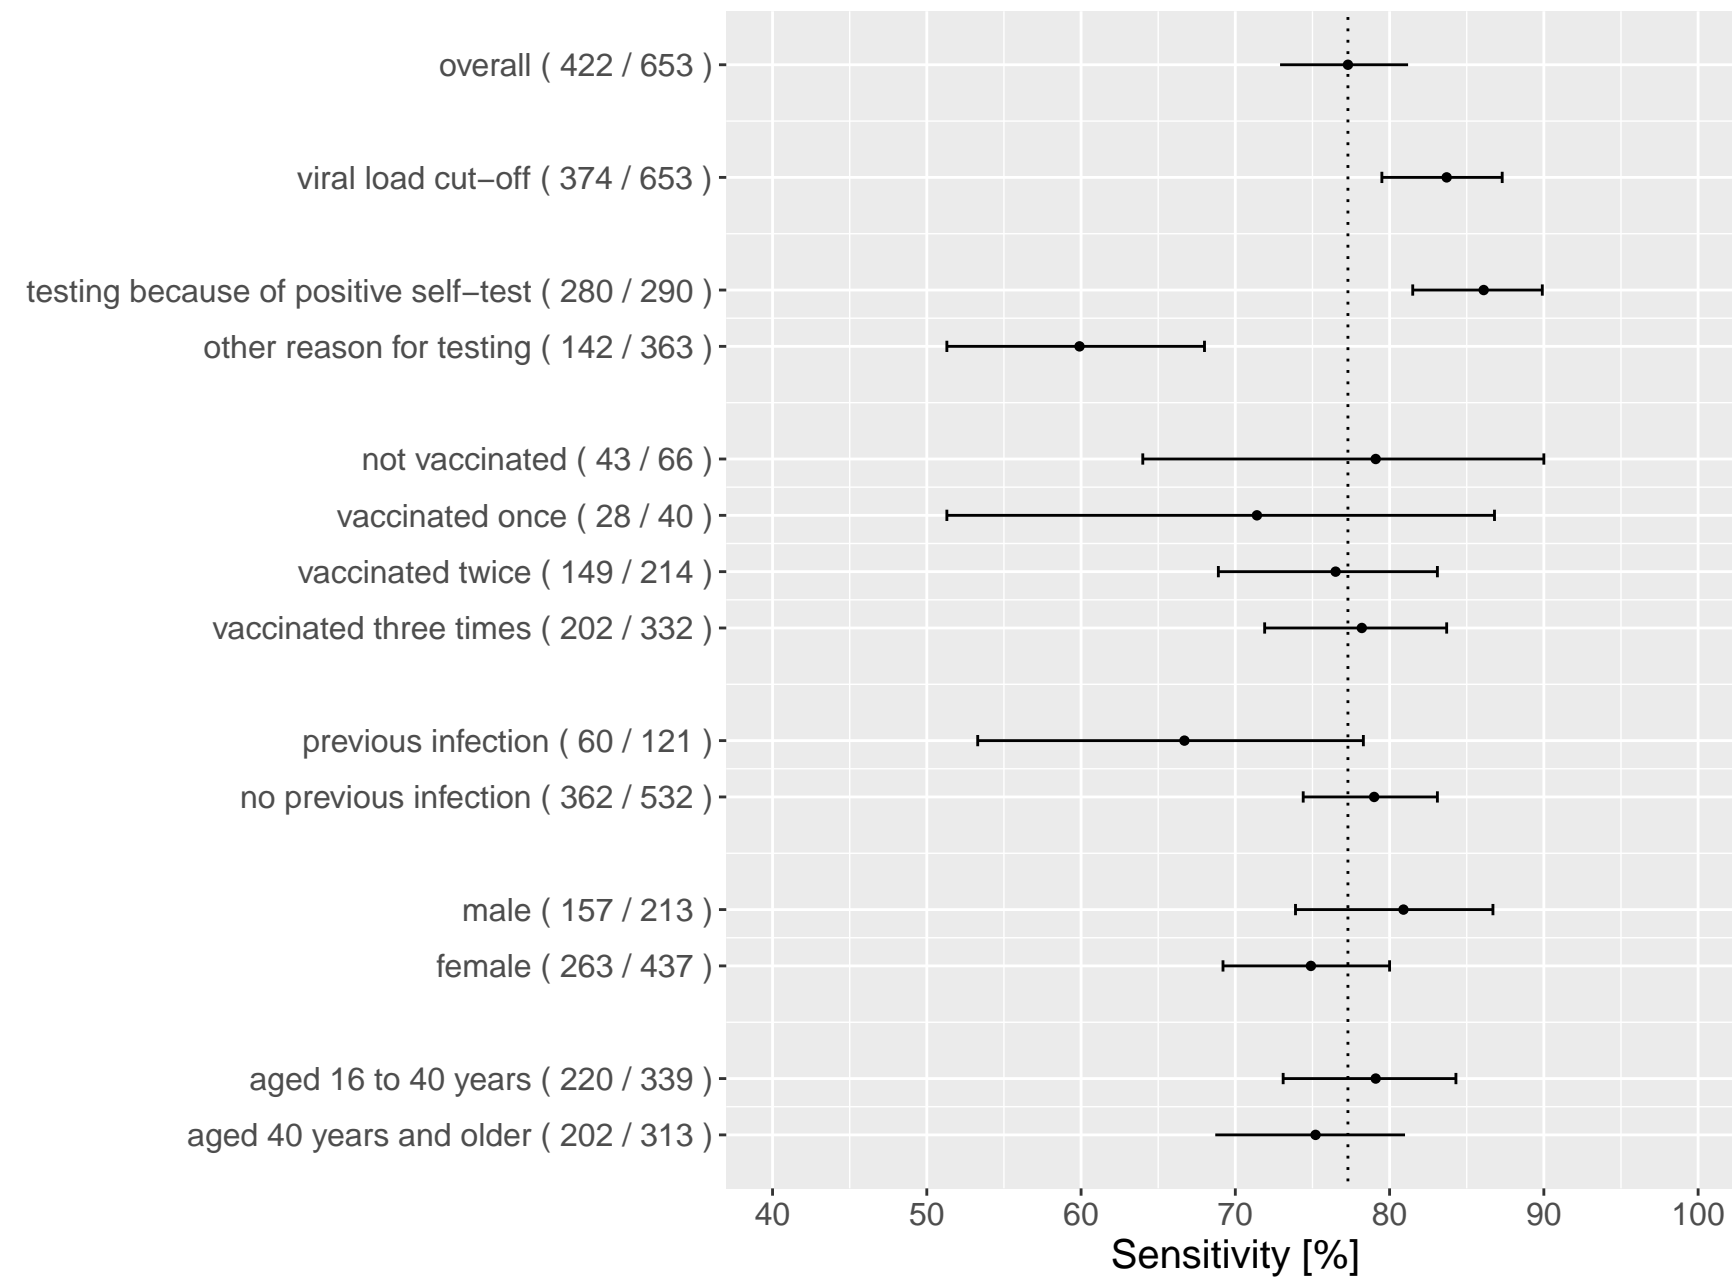

Flowflex

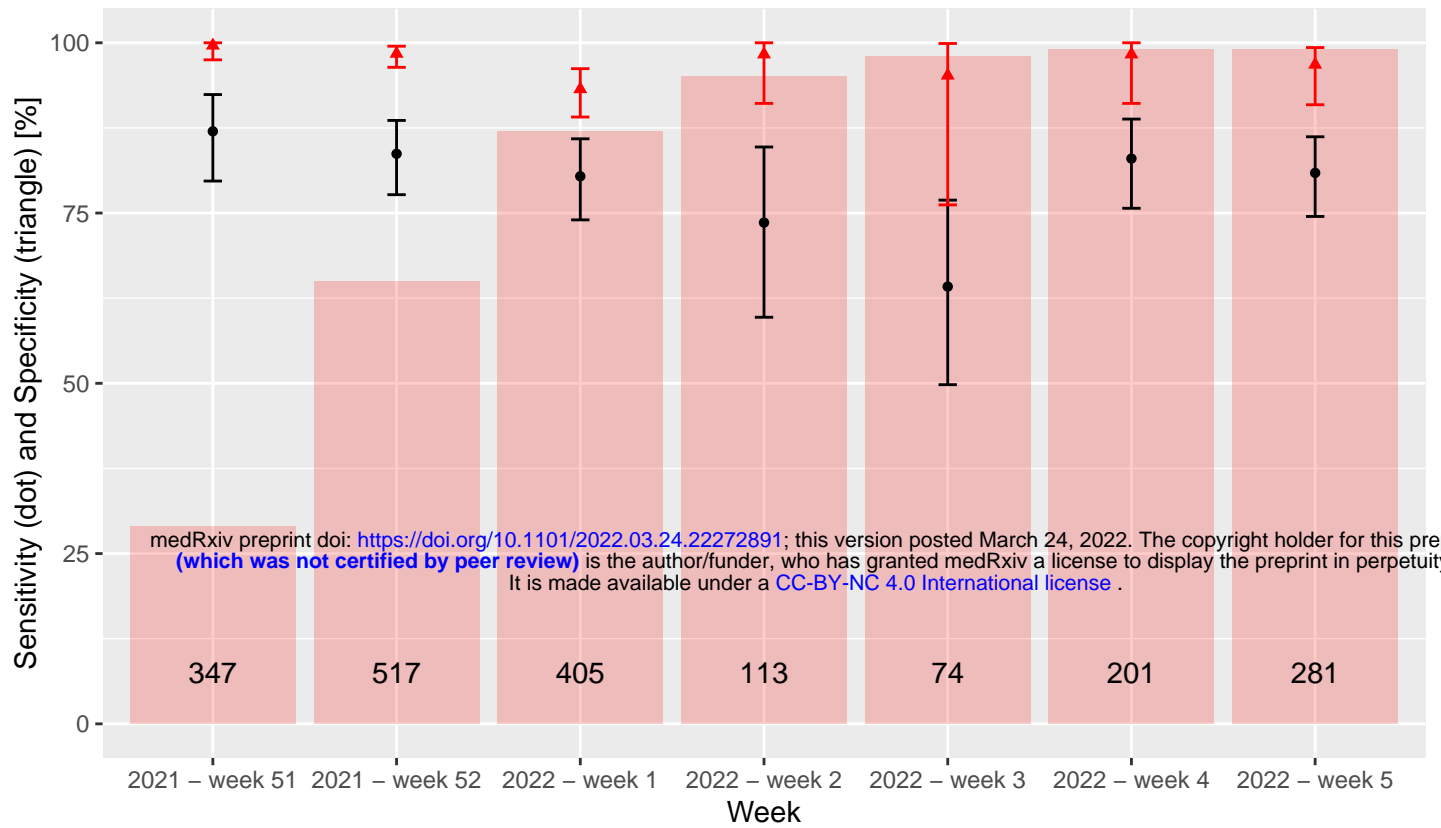

Flowflex at viral load cut-off

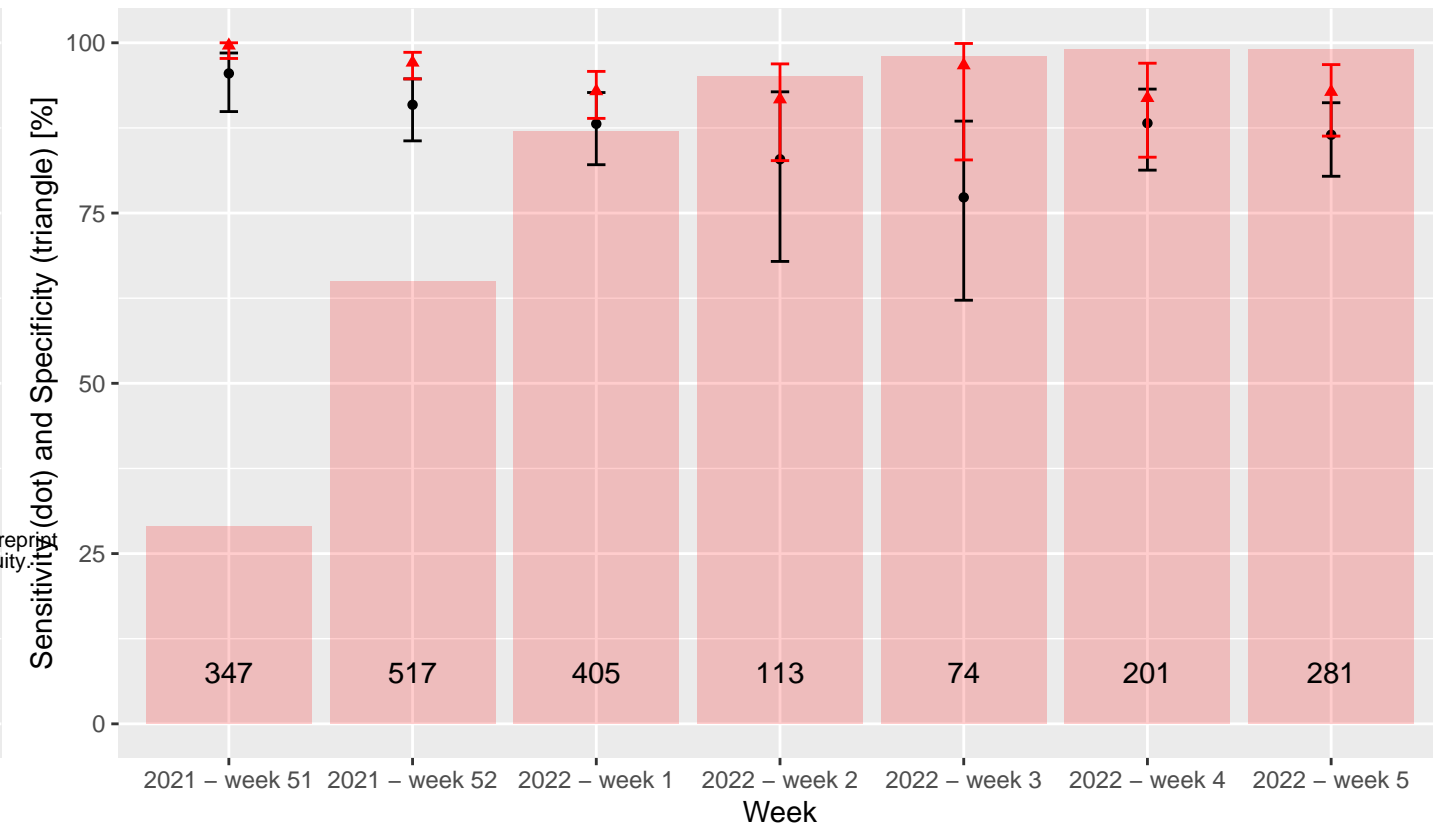

MPBio

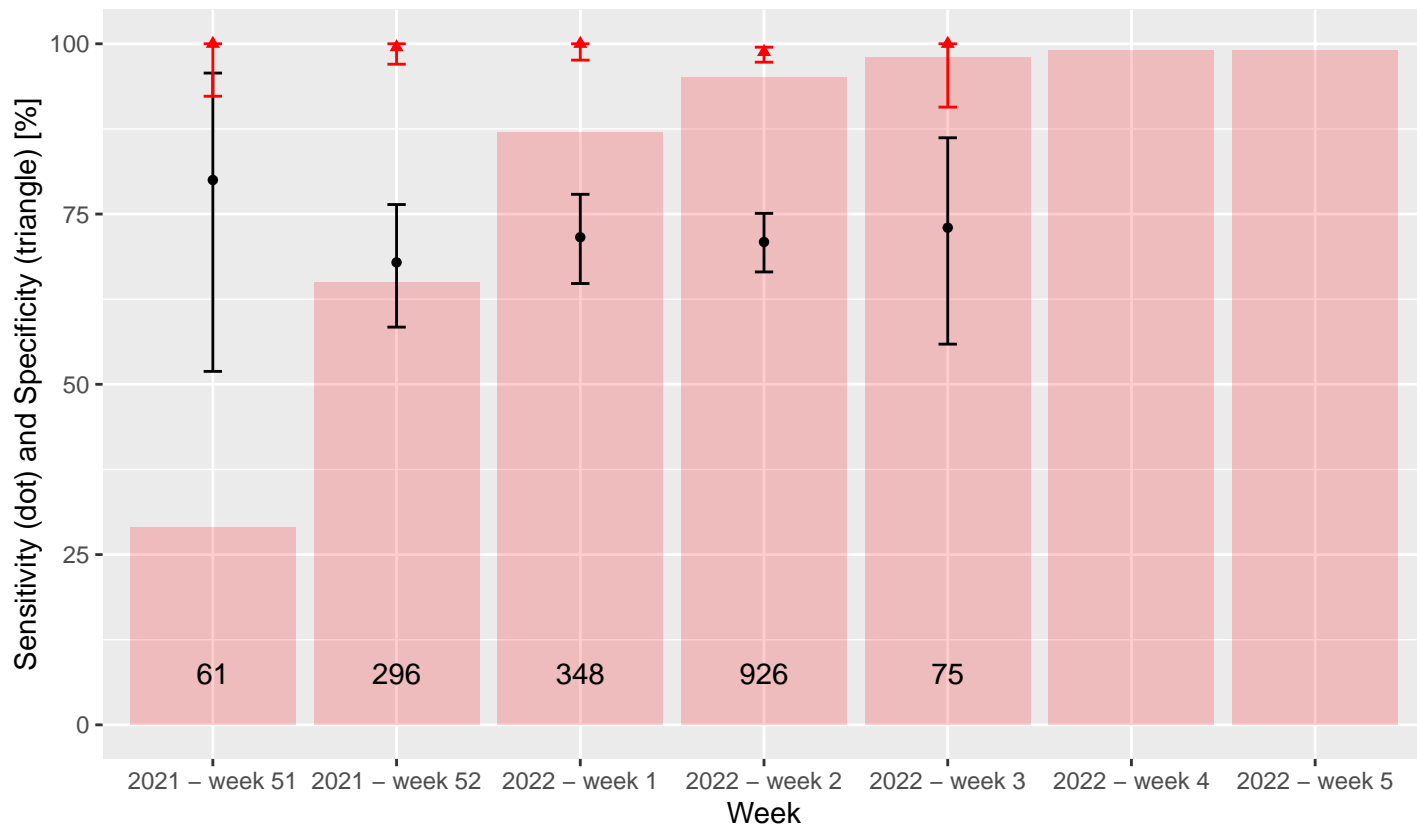

MPBio at viral load cut-off

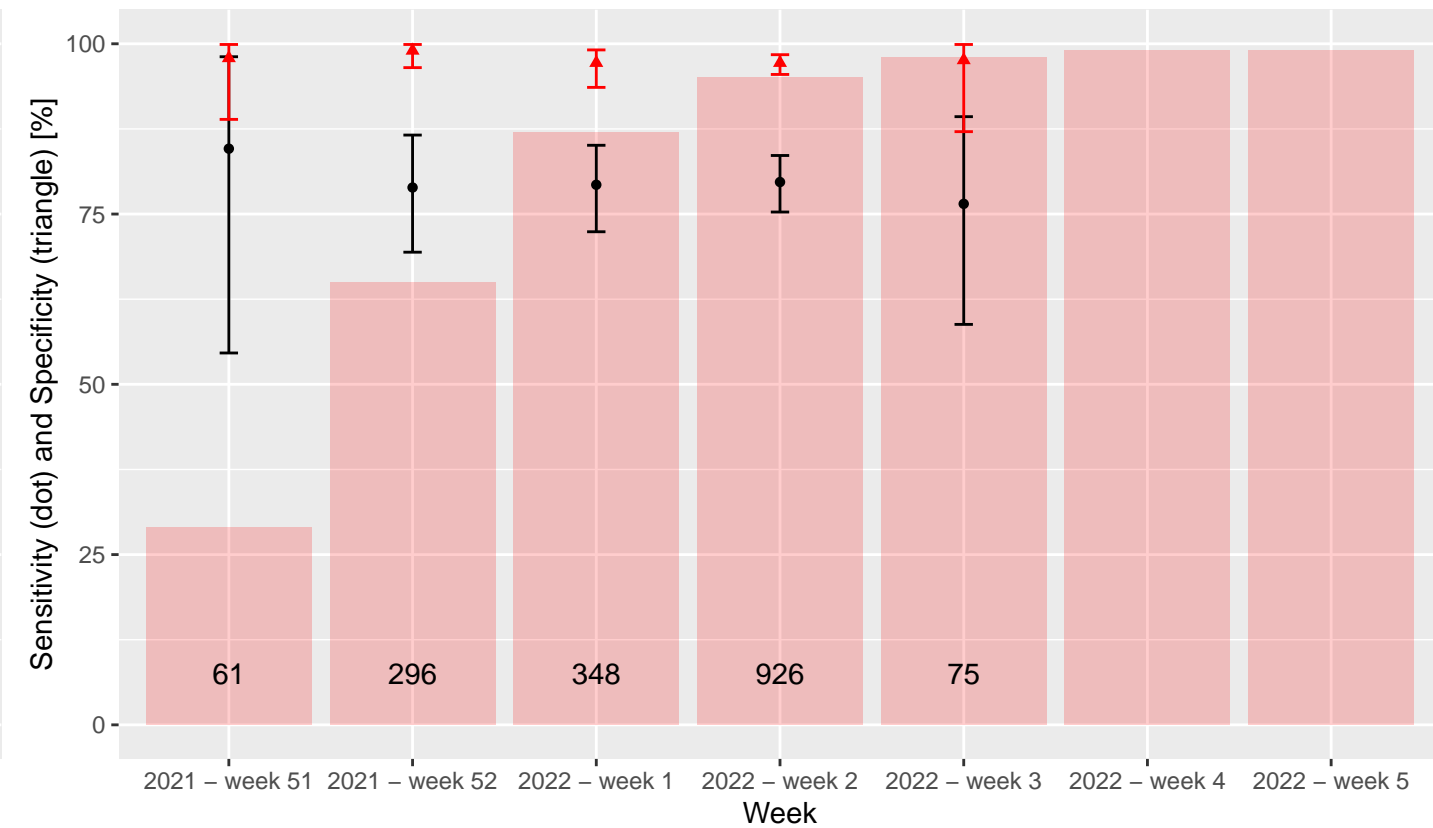

Clinitest

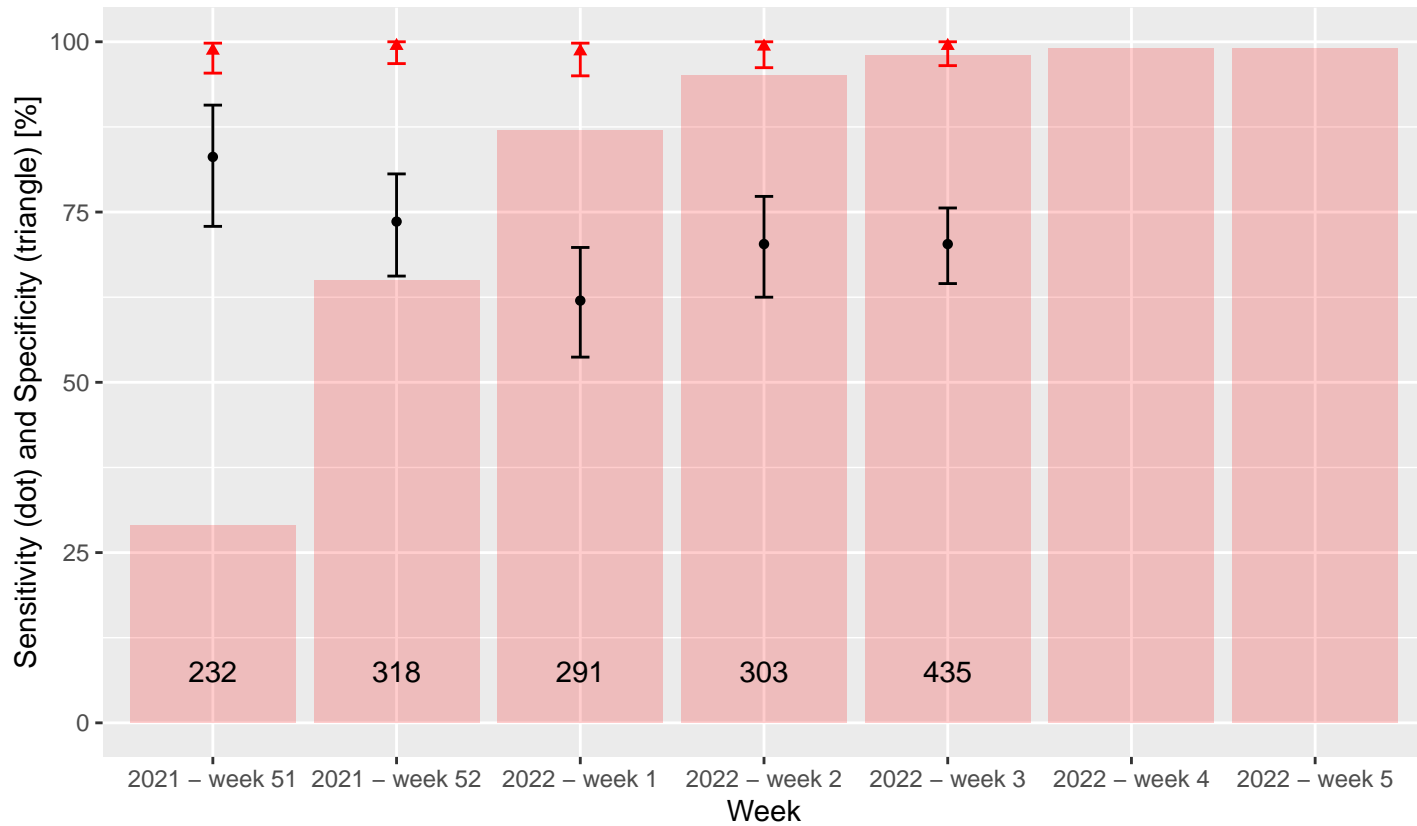

Clinitest at viral load cut-off

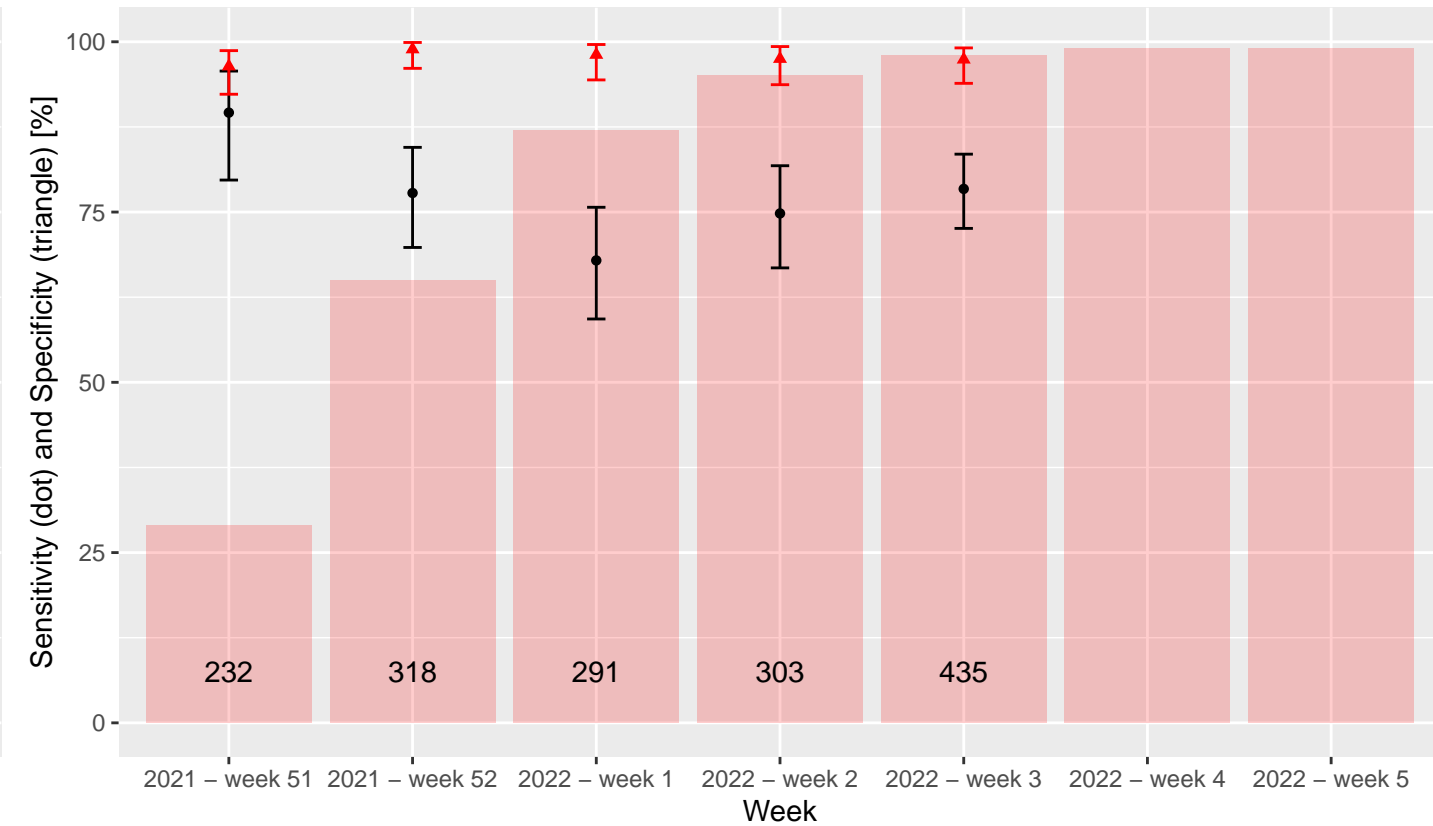

Source: https://www.medrxiv.org/content/medrxiv/early/2022/03/24/2022.03.24.22272891.full.pdf
