# Supplementary material for: Accuracy of COVID-19 self-tests with unsupervised nasal or nasal plus oropharyngeal self-sampling in symptomatic individuals in the Omicron period
Source: bioRxiv or medRxiv preprint supplement (doi:10.1101/2022.03.24.22272891), 2022-03-24

*Flowflex, nasal sampling*

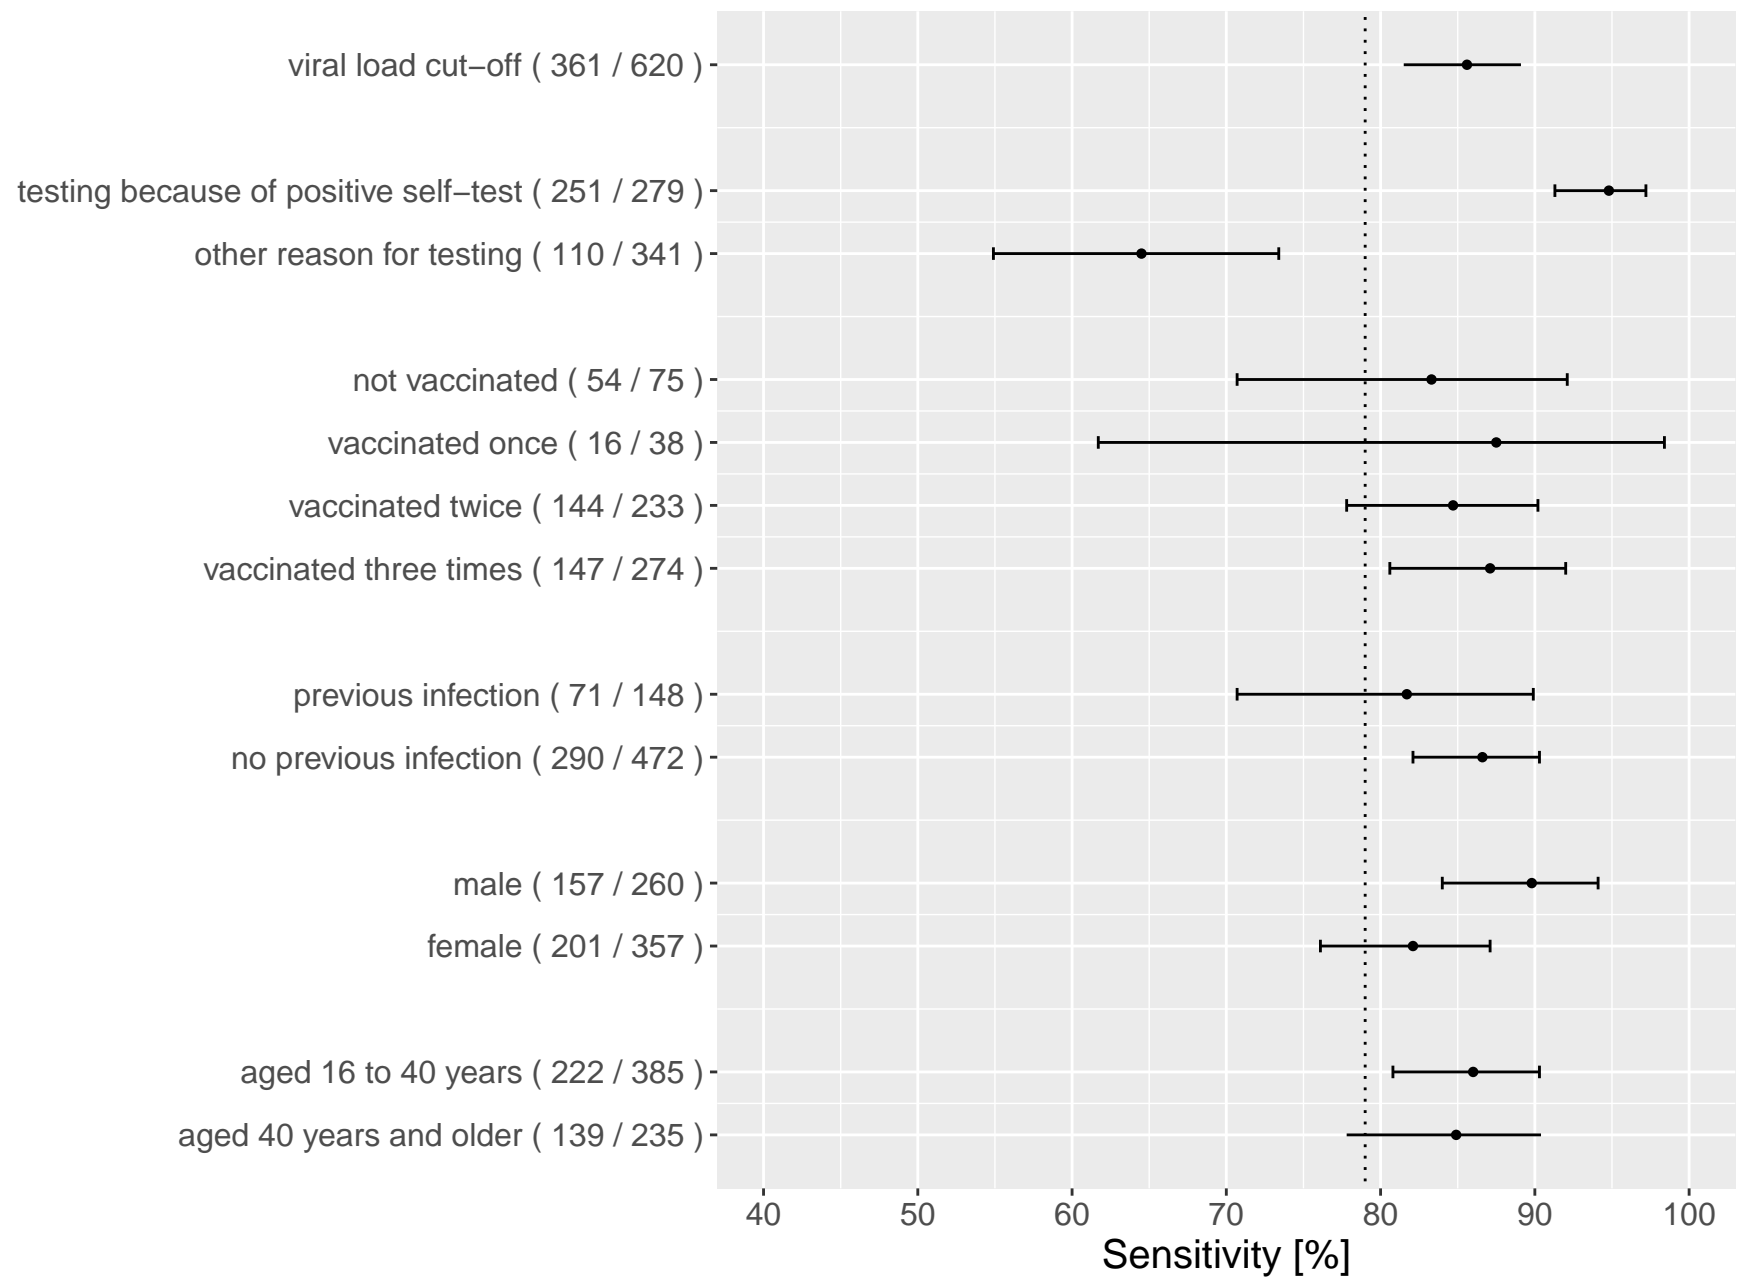

*MPBio, nasal sampling*

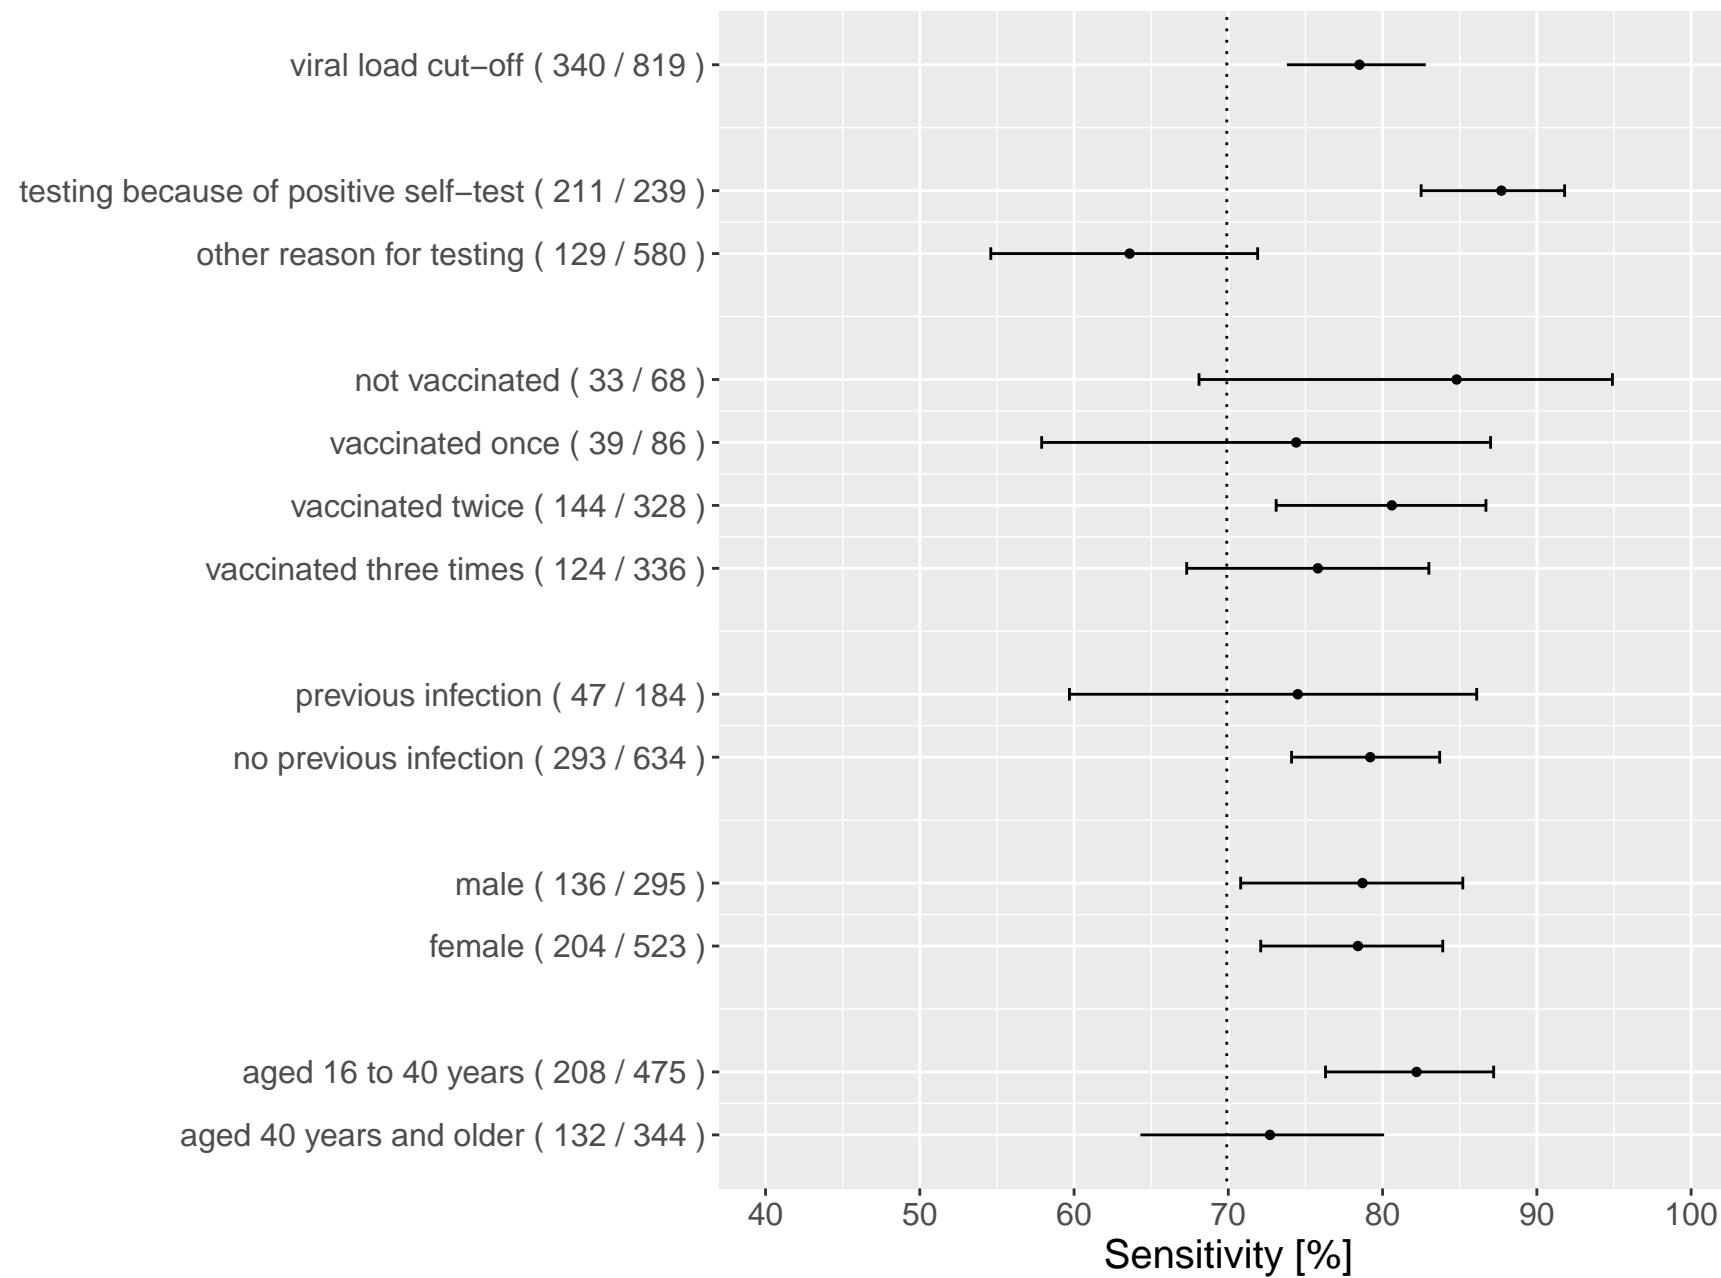

*Clinitest, nasal sampling*

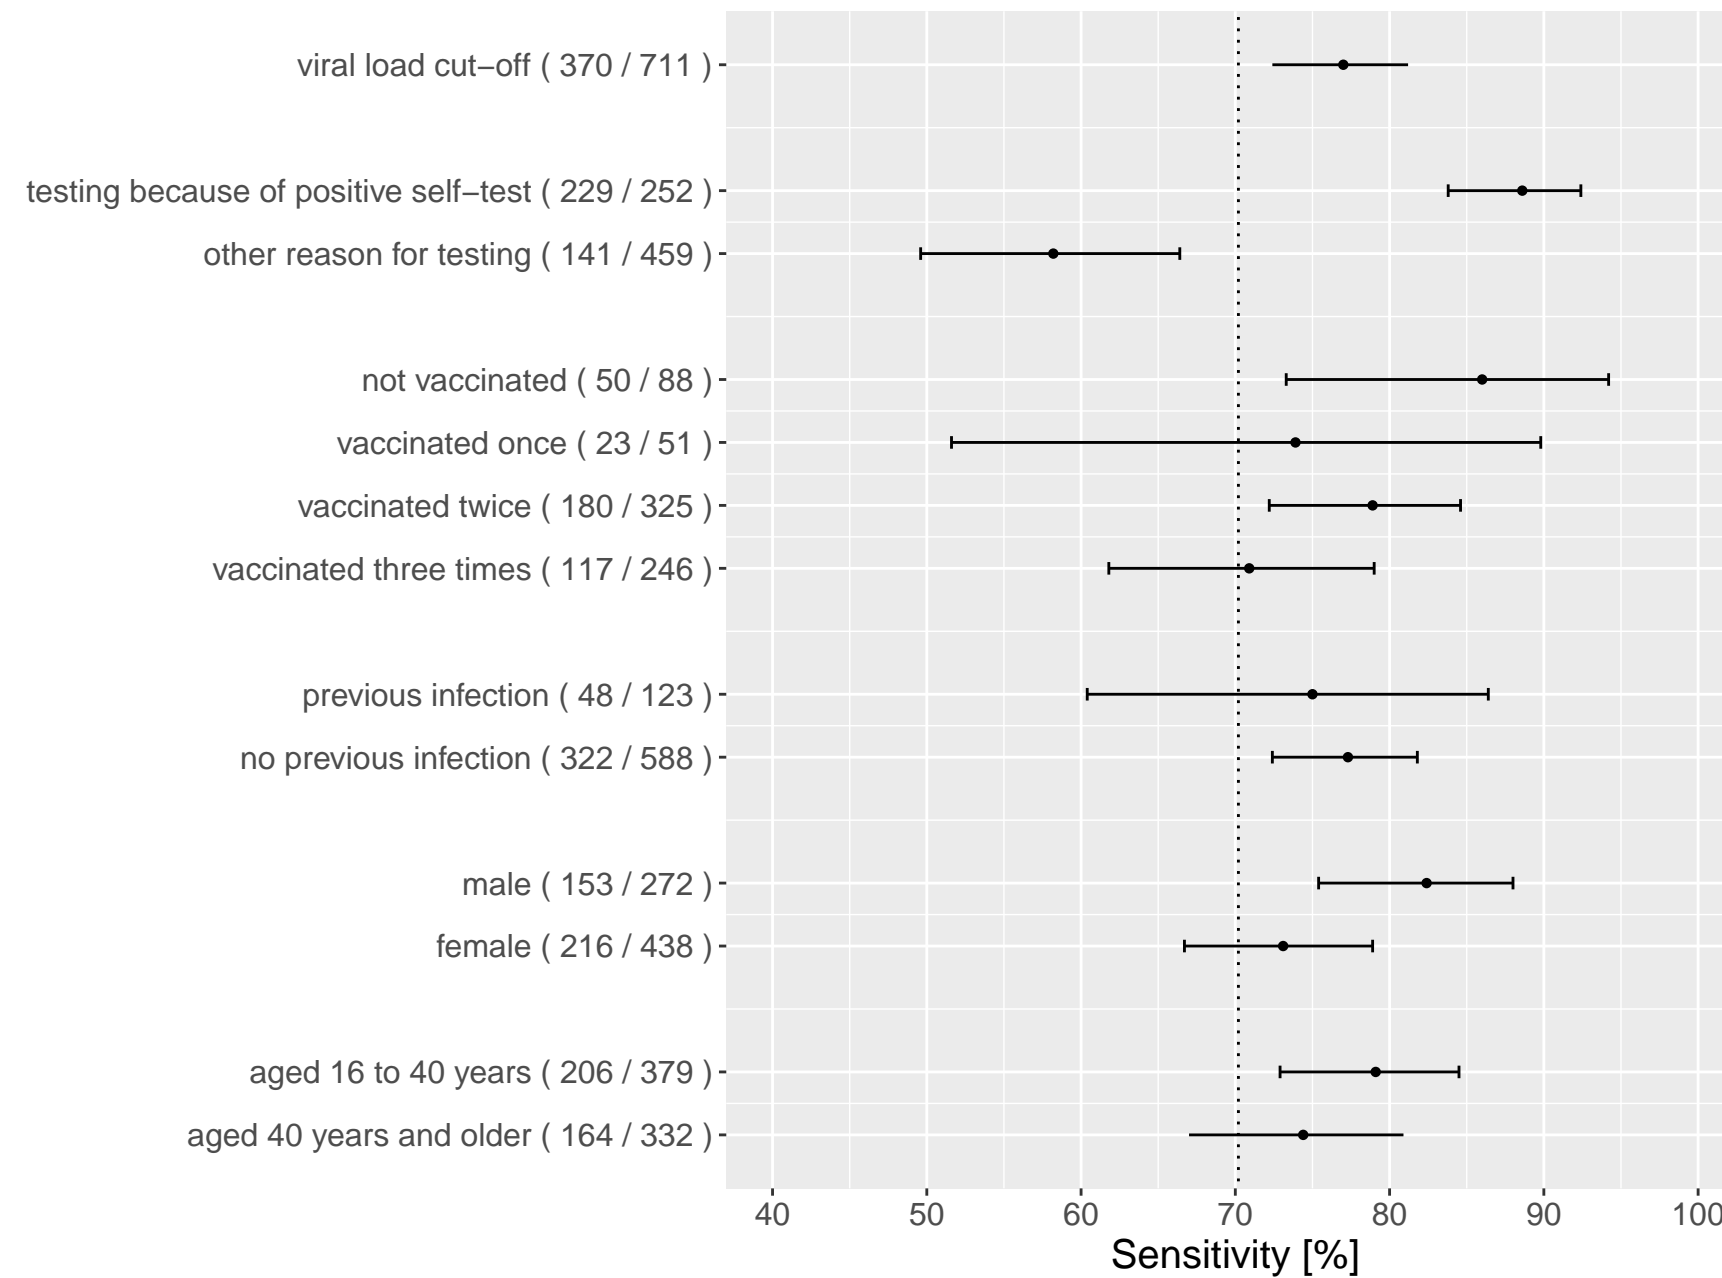

*MPBio, oropharyngeal-nasal sampling*

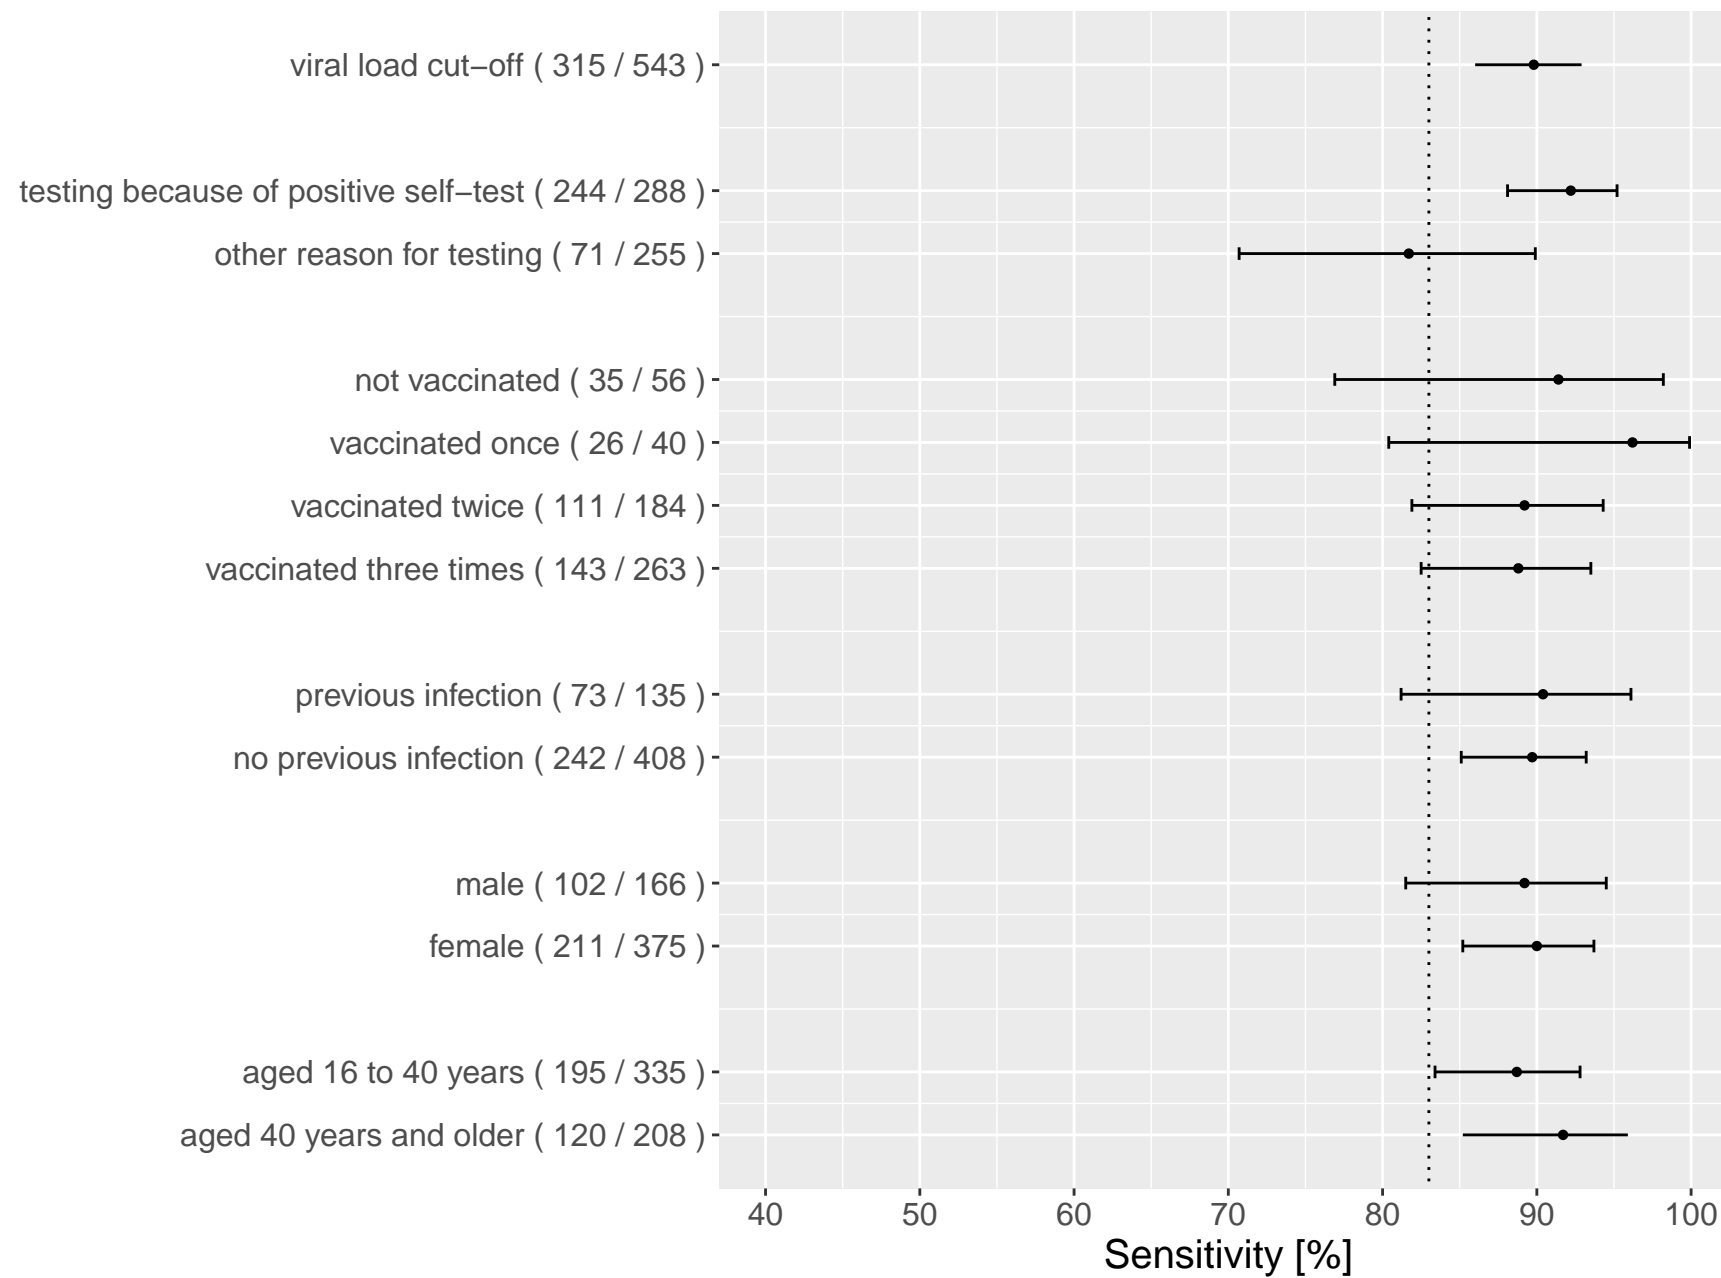

*Clinitest, oropharyngeal-nasal sampling*

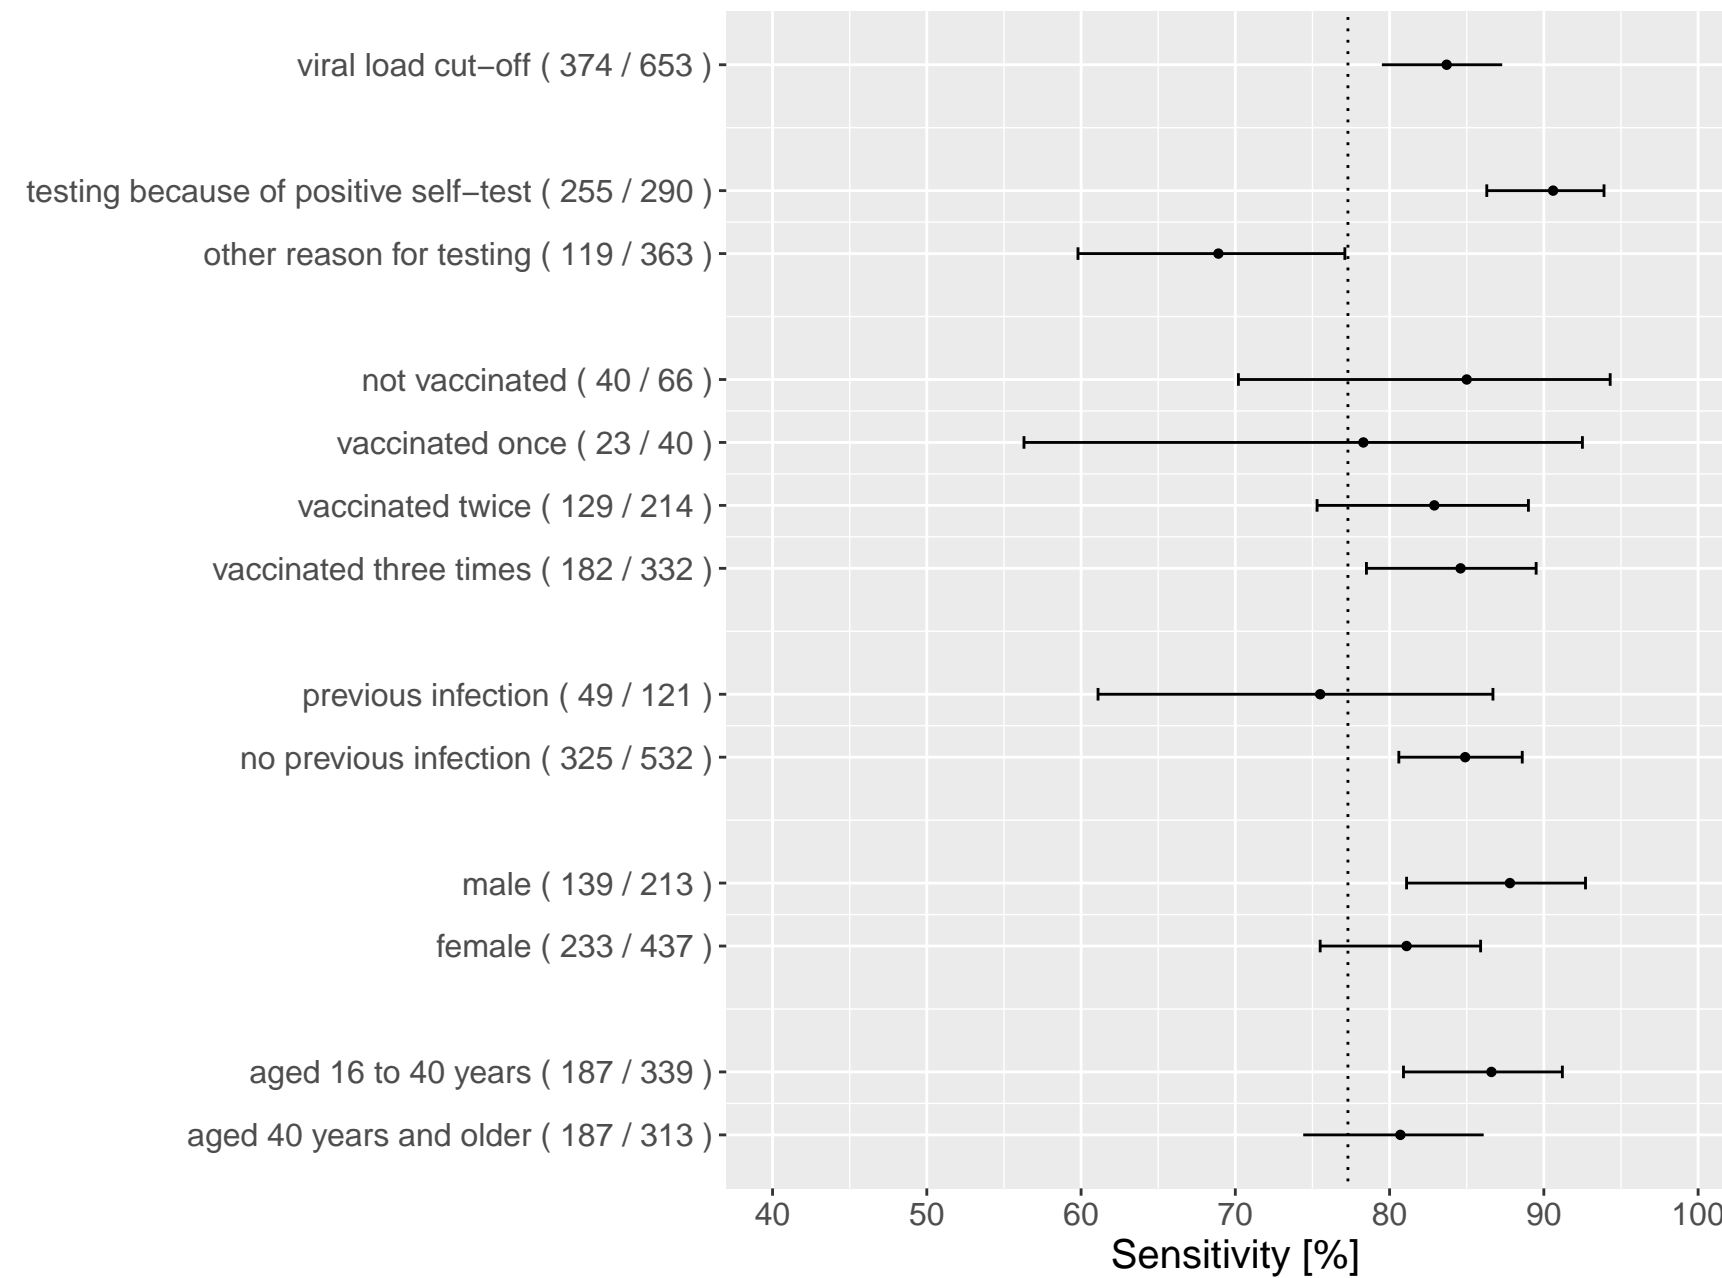

Supplement: Supplementary file [file media-3.pdf]
